# Supplementary material for: Supervision training interventions in the health and human services: realist synthesis protocol
Source: PubMed Central journal article supplement — BMJ Open. 2019 Jun 1;9(5):e025777. doi: 10.1136/bmjopen-2018-025777 (PMC6549728; doi:10.1136/bmjopen-2018-025777), 2019-06-01

# BMJ Open

BMJ Open is committed to open peer review. As part of this commitment we make the peer review history of every article we publish publicly available.

When an article is published we post the peer reviewers' comments and the authors' responses online. We also post the versions of the paper that were used during peer review. These are the versions that the peer review comments apply to.

The versions of the paper that follow are the versions that were submitted during the peer review process. They are not the versions of record or the final published versions. They should not be cited or distributed as the published version of this manuscript.

BMJ Open is an open access journal and the full, final, typeset and author-corrected version of record of the manuscript is available on our site with no access controls, subscription charges or pay-per-view fees (<http://bmjopen.bmj.com>).

If you have any questions on BMJ Open's open peer review process please email [info.bmjopen@bmj.com](mailto:info.bmjopen@bmj.com)

# BMJ Open

## Supervision training interventions in the health and human services: a realist synthesis protocol

|                               |                                                                                                                                                                                                                                                                                                                                                                                                                                                                                                                                                                                                                                                                                                                                                                                                                                                                                                                                                            |
|-------------------------------|------------------------------------------------------------------------------------------------------------------------------------------------------------------------------------------------------------------------------------------------------------------------------------------------------------------------------------------------------------------------------------------------------------------------------------------------------------------------------------------------------------------------------------------------------------------------------------------------------------------------------------------------------------------------------------------------------------------------------------------------------------------------------------------------------------------------------------------------------------------------------------------------------------------------------------------------------------|
| Journal:                      | <i>BMJ Open</i>                                                                                                                                                                                                                                                                                                                                                                                                                                                                                                                                                                                                                                                                                                                                                                                                                                                                                                                                            |
| Manuscript ID                 | bmjopen-2018-025777                                                                                                                                                                                                                                                                                                                                                                                                                                                                                                                                                                                                                                                                                                                                                                                                                                                                                                                                        |
| Article Type:                 | Protocol                                                                                                                                                                                                                                                                                                                                                                                                                                                                                                                                                                                                                                                                                                                                                                                                                                                                                                                                                   |
| Date Submitted by the Author: | 01-Aug-2018                                                                                                                                                                                                                                                                                                                                                                                                                                                                                                                                                                                                                                                                                                                                                                                                                                                                                                                                                |
| Complete List of Authors:     | Lee, Sarah; Monash University, Faculty of Medicine, Nursing & Health Sciences, Monash Centre for Scholarship in Health Education (MCSHE) Denniston, Charlotte; Monash University, Monash Centre for Scholarship in Health Education (MCSHE); The University of Melbourne, Melbourne Medical School, Department of Medical Education<br>Edouard, Vicki; Monash University, Faculty of Medicine, Nursing & Health Sciences, Monash Centre for Scholarship in Health Education (MCSHE)<br>Palermo, Claire; Monash University, Faculty of Medicine, Nursing & Health Sciences, Monash Centre for Scholarship in Health Education (MCSHE)<br>Pope, Kirsty; Monash University, Department of Occupational Therapy<br>Sutton, Keith; Monash University, Rural Health<br>Waller, Susan; Monash University, Rural Health<br>Ward, Bernadette; Monash University, Rural Health<br>Rees, Charlotte; Monash University, Faculty of Medicine, Nursing & Health Sciences |
| Keywords:                     | med, QUALITATIVE RESEARCH, STATISTICS & RESEARCH METHODS, EDUCATION & TRAINING (see Medical Education & Training)                                                                                                                                                                                                                                                                                                                                                                                                                                                                                                                                                                                                                                                                                                                                                                                                                                          |
|                               |                                                                                                                                                                                                                                                                                                                                                                                                                                                                                                                                                                                                                                                                                                                                                                                                                                                                                                                                                            |

SCHOLARONE™  
Manuscripts

1  
2  
3 **Supervision training interventions in the health and human services: a realist synthesis protocol**  
4

5 Sarah Lee,<sup>1</sup> Charlotte Denniston,<sup>1,2,3</sup> Vicki Edouard,<sup>1</sup> Claire Palermo,<sup>1</sup> Kirsty Pope,<sup>4</sup> Keith Sutton,<sup>5</sup>  
6  
7 Susan Waller,<sup>5</sup> Bernadette Ward,<sup>6</sup> Charlotte E Rees<sup>1</sup>  
8  
9

10  
11  
12  
13 <sup>1</sup>Monash Centre for Scholarship in Health Education (MCSHE), Monash University, Clayton, Australia  
14

15  
16 <sup>2</sup>Department of Medical Education, Melbourne University, Melbourne, Australia  
17

18  
19 <sup>3</sup>College of Intensive Care Medicine of Australia and New Zealand, Prahran, Australia  
20

21  
22 <sup>4</sup>Department of Occupational Therapy, Monash University, Frankston, Australia  
23

24  
25 <sup>5</sup>Monash University Department of Rural Health, Monash University, Moe, Australia  
26

27  
28 <sup>6</sup>Monash Rural Health, Bendigo, Monash University, Australia  
29  
30  
31

32 **Correspondence to:**  
33

34  
35 Sarah Lee, Monash Centre for Scholarship in Health Education (MCSHE), Monash University, 27  
36

37 Rainforest Walk, Room 321, Clayton Campus, VIC 3800, Australia; Tel: +61 (0)3 9905 1910;  
38

39 Email: sarah.lee1@monash.edu  
40  
41  
42  
43  
44  
45  
46  
47  
48  
49  
50  
51  
52  
53  
54  
55  
56  
57  
58  
59  
60

## ABSTRACT

**Introduction:** Supervision training aims to develop workplace supervisory competencies. Despite extensive supervision literature, including literature reviews, the mechanisms through which supervision training interventions produce their effects, for whom, and under what circumstances is not clearly delineated. The purpose of this study is to explain the effect of contextual factors on the underpinning mechanisms of supervision training outcomes.

**Methods and analysis:** We propose to examine supervision training interventions across the health and human services workforce using realist methods. Pawson's five stages for undertaking a realist synthesis will be followed: (1) clarifying the scope of the review; (2) determining the search strategy; (3) study selection; (4) extracting data; and (5) synthesising the evidence and drawing conclusions. Extracted data will include study characteristics, intervention type, contextual factors, underlying mechanisms and supervision training outcomes. Patterns in context-mechanism-outcome configurations will be identified. Initial programme theories will be determined based on a comprehensive search of the literature, which will include key terms relating to supervision and training. The search strategy will involve: (1) electronic database searching using Medline, CINAHL, Social Services Abstracts, ERIC, PsycINFO and APAIS; (2) hand and citation searching; and (3) grey literature searching. We will also contact authors where necessary and discuss identified literature amongst the project team with extensive expertise in supervision training.

**Ethics and Dissemination:** The realist synthesis will propose an evidence-based theory of supervision training interventions (i.e. what interventions work for whom and why). The findings will be disseminated in peer-reviewed journals and presentations and through discussions with relevant organisations and stakeholders. The research will be utilised by educators to develop evidenced-based supervision training interventions. It will also help workplace supervisors to better understand what types of supervision training might work most optimally for them and their colleagues. Other researchers could use the synthesis findings to guide future supervision research.

### Strengths and limitations of this study

- This review will identify how and why components of supervision training are effective (or not) within various contexts in the health and human services workforce, rather than merely focusing on whether supervision training is effective.
- A large multidisciplinary research team lends high quality relevance and rigour checks and more comprehensive data interpretation.
- The realist synthesis is well suited to the evaluation of complex interventions such as supervision training.
- Only English language studies will be included, so findings might lack transferability to supervision training interventions in non-English speaking countries.
- Including adequate search terms to incorporate both health and human services is a challenge, meaning that some evidence may be missed.

## INTRODUCTION

Supervision is a distinct professional activity characterised by the training and professional development of supervisees,<sup>1,2</sup> and in some literature is understood to be partly hierarchical and evaluative.<sup>3</sup> Although the definition of supervision varies in terms of its purposes, arguably one of the most widely adopted models describing the purpose and functions of supervision is that of Proctor,<sup>4</sup> who outlined three functions of supervision: normative (managerial), formative (educational) and restorative (supportive). The normative function depicts the role supervision plays as a mechanism for ensuring ethical, acceptable and quality practice.<sup>5</sup> The formative function of supervision encompasses developmental aspects such as gaining knowledge, communication skills, trust in self and confidence.<sup>6</sup> The restorative function focuses on providing support to alleviate burnout and stress.<sup>7</sup> All three functions highlight supervision as a protective factor in professional practice.<sup>8</sup>

A guideline for what constitutes effective supervision for both the supervisor and supervisee has been outlined in the literature.<sup>9</sup> Effective supervision has been described to include but is not limited to: supervisees choosing their own supervisors,<sup>10</sup> deciding on the most suitable types of supervision (e.g. one-to-one or peer group supervision or a combination of both),<sup>11</sup> establishing a supervision agreement or contract and using a supervision agenda,<sup>12</sup> choosing venues away from supervisees' workplaces to conduct supervision sessions, having an optimal meeting length and frequency (e.g. at least one hour every four weeks),<sup>13</sup> using effective communication and feedback<sup>14</sup>, facilitating reflective practice, use of more than one mode for distance supervision, building a positive supervisory relationship (e.g. one that is positive, supportive, trustworthy, non-judgmental and encouraging),<sup>10,12</sup> separating clinical supervision from line management, undertaking training in supervision and evaluating supervision (either through formal or informal methods).<sup>15</sup>

Effective supervision is that which has positive outcomes across all levels of an organisation,<sup>16</sup> including for the client/patient (e.g. improved client/patient outcomes), and the organisation as a

1  
2  
3 whole (e.g. improved standards and quality of service delivery).<sup>9,12</sup> Benefits of effective supervision  
4 for practitioners include developing competence and knowledge,<sup>17</sup> reducing burnout,<sup>18</sup> and assisting  
5 practitioners to cope better with their work and workplace.<sup>13</sup> When conducted effectively,  
6 supervision can provide an opportunity for practitioners to reflect on their practice and establish  
7 new approaches to supervision.<sup>9</sup> While effective supervision and its outcomes has been clearly  
8 delineated in the literature,<sup>19-21</sup> the same attention has not been afforded to what constitutes  
9 effective training for supervisors.<sup>2,22</sup>

10  
11  
12  
13  
14  
15  
16  
17  
18 This realist synthesis protocol specifically focuses on supervision practiced in health and human  
19 services contexts and is part of a broader programme of research investigating supervision training  
20 in these contexts including: health, housing, children services, youth and family services, alcohol and  
21 drug services and mental health. What follows is a brief outline of: i) the characteristics of  
22 supervision within these contexts; and ii) the different modes of supervision training commonly  
23 implemented to support supervisors within these settings.

### 31 **Local context: Supervision in the health and human services**

32  
33 Literature within health and human services predominately describes supervision as an educative  
34 process. For the most part, the literature embraces the formative and restorative functions of  
35 Proctor's model, thereby characterising supervision as both a platform for practitioners to develop  
36 knowledge, and a mechanism of professional support.<sup>18,23</sup> However, within mental health settings,  
37 the normative function of supervision is typically privileged, with supervision considered as an  
38 important factor in ensuring staff competence and enabling best practice outcomes for consumers  
39 and carers.<sup>24</sup> Other allied health professions, such as physiotherapy and speech therapy, report using  
40 discipline-specific supervisory models for a combination of normative, formative *and* restorative  
41 functions.<sup>10,25,26</sup>

42  
43  
44  
45  
46  
47  
48  
49  
50  
51  
52  
53  
54 In terms of the human services workforce, in some areas of the workforce like alcohol and other  
55 drug services, the empirical evidence for the function of supervision is sparse.<sup>27</sup> Supervision for

1  
2  
3 human services workers appears more complex due to the vast array of diverse settings in which  
4 these professionals work. Consequently, there seems to be a multiplicity of definitions, models and  
5 applications of supervision within this literature,<sup>28 29</sup> mirroring the broader supervision literature  
6 discussed above.  
7  
8  
9

## 10 11 12 **Supervision training**

13  
14 Supervision training is a common way to support supervisors and prepare them for their supervisory  
15 role within health and human services. Supervision training is typically a process for enhancing  
16 supervisor behaviour to improve the outcomes of the supervisory process.<sup>30 31</sup> Current literature  
17 suggests that there is a variety of training methods used to support the development of effective  
18 supervisors.<sup>32 33</sup> Supervision training can be in the form of formal training (e.g. face-to-face or online  
19 workshops and/or seminars), training received informally (e.g. role-modelling and observation),  
20 and/or self-directed learning (e.g. guided reading).<sup>33</sup> Supervisors typically receive little or no formal  
21 training for their supervision role and little is known about how supervisors acquire competence.<sup>33</sup>  
22  
23 Supervisor training is rarely empirically or theoretically grounded,<sup>3</sup> and it appears that most  
24 professionals learn supervisor skills by assimilating their own experiences as supervisees or through  
25 informal methods (e.g. observation). The process of learning to be a supervisor therefore often  
26 occurs by default.<sup>34</sup>  
27  
28  
29  
30  
31  
32  
33  
34  
35  
36  
37  
38  
39

40 Inadequate attention to supervision outcomes, supervision training and supervision research,  
41 however, has started to raise concerns about the quality of supervision delivered across a number of  
42 different disciplines.<sup>35 27 36 37</sup> The assumption that experience as a practitioner or a supervisee  
43 translates into becoming an effective supervisor is, of course, erroneous.<sup>38</sup> Indeed, there is a  
44 distinction between practitioner skills and supervisor skills,<sup>33</sup> and specific training to develop  
45 supervisory competence is crucial.  
46  
47  
48  
49  
50  
51  
52  
53

54 While there is broad understanding about what constitutes effective supervision,<sup>19-21</sup> little attention  
55 has been paid to what constitutes effective *training* of supervisors.<sup>2 22</sup> Therefore, insufficient clarity  
56  
57  
58  
59



1  
2  
3 still exists regarding how supervisors should be trained to become effective supervisors.<sup>33</sup> It has  
4  
5 been said that: 'research on the effectiveness of supervision training remains virtually non-  
6  
7 existent'.<sup>39, p219</sup>  
8

9  
10 Three reviews (two systematic, one narrative) regarding supervision training have been published  
11 since 2004,<sup>33 38 40</sup> and these provide a useful starting point to understand supervision training. Firstly,  
12  
13 Gonsalvez<sup>38</sup> conducted a narrative review of clinical supervision training changes in professional  
14  
15 psychology within Australia, both examining and addressing solutions to emerging problems.  
16  
17 Gonsalvez identified a need for better regulation of supervisory practice within psychology and  
18  
19 recommended that supervisory practice be supported with enhanced development of resources (e.g.  
20  
21 manuals, workbooks and better psychometric tools to evaluate supervisory processes). Secondly,  
22  
23 Milne<sup>33</sup> conducted a systematic review of controlled trials of supervision interventions and found  
24  
25 clear empirical support for supervisor training; training which when effective could help to bridge  
26  
27 the gap between policy and practice, and ensure that therapies within the mental health field are  
28  
29 implemented with fidelity. Milne's review also helps us to understand the complexity and diversity  
30  
31 of supervisor training. For example, he found 56 supervisor-training methods were used across the  
32  
33 11 studies reviewed. Training methods included: workshops, role-play, modelling, guided reading,  
34  
35 direct observation and/or teaching (through verbal instruction). Finally, Tsutsumi's<sup>40</sup> systematic  
36  
37 review, including 7 controlled studies assessing the effect of supervisor training on the mental health  
38  
39 of subordinate workers, proposed an evidenced-based guideline for supervisor training, which  
40  
41 included: what training content should include, the aim (e.g. behaviour modification among  
42  
43 supervisors), frequency of training (i.e. yearly) and the target population for training (e.g. all  
44  
45 supervisors). The guideline aimed to improve the mental health of workers by ensuring that all  
46  
47 supervisors were trained and would therefore be better equipped to support the mental health of  
48  
49 their workers.  
50  
51  
52  
53  
54  
55  
56  
57  
58  
59  
60

1  
2  
3 While these reviews have made a helpful start in illustrating what effective supervision training can  
4 look like, they have their limitations. For example, these reviews do not include recently published  
5 papers (i.e. papers published from 2010 onwards), they only include a small number of papers (i.e.  
6 two systematic reviews with 7 and 11 controlled studies<sup>40 33</sup> respectively, and one narrative review  
7 which did not clearly indicate the number of papers reviewed).<sup>38</sup> Additionally, these previous  
8 reviews tend to focus either on the mental health context only or on supervisory support for  
9 workers' mental health, thereby failing to explore supervision training across a diverse range of  
10 health and human services professions. Furthermore, none of these reviews explore the extent to  
11 which supervision training interventions produce their effects, how, for whom and under what  
12 circumstances (i.e. with respect to context). Therefore, the synthesis described in this protocol aims  
13 to address this gap in knowledge. Utilising a realist approach, this study will allow interpretability of  
14 findings across contexts and will address the question of what supervision training interventions  
15 work, for whom, under what circumstances, how and why.

### 30 **Realist synthesis methodology**

31  
32 Traditional methodological approaches to evaluating interventions, such as randomised controlled  
33 trials (RCTs), are orientated towards conceptually simple questions of causality such as: 'is this  
34 intervention effective or not?' Such a question of causality tends to be better suited to clinical  
35 treatments rather than complex health and education interventions such as supervision training.  
36 Realist methodology, therefore, is being used increasingly to study the workings of complex health  
37 and education interventions.<sup>41-47</sup> Realist approaches privilege context in the evaluation of  
38 interventions. For example, a realist approach acknowledges that an intervention that works well  
39 within any given healthcare service (e.g. supervision training for doctors), may not work well within a  
40 human service context in the community (e.g. supervision training for housing or child protection  
41 professionals). Therefore, understanding contextual variation and how this impacts the effectiveness  
42 (or otherwise) of an intervention is crucial to the development and implementation of complex  
43 interventions. This review will be underpinned by scientific realism, which is a logic of inquiry that

1  
2  
3 generates distinct research strategies and utilises research methods and techniques within these to  
4 ascertain an in-depth understanding of causality.<sup>48</sup> Such realism will help us to unpack and  
5 synthesise hidden mechanisms at play within primary studies, thus allowing us to gain deeper  
6 understandings about how supervisor training as a complex programme works or fails to work, and  
7 why in our chosen different settings.<sup>38</sup>

## 14 **Study aim and research questions**

16 This study aims to address the ways in which supervision training interventions impact and influence  
17 supervisory practice, for whom and under what circumstances, how and why. The research  
18 questions for this realist synthesis protocol are as follows:  
19  
20

- 21 1) In what ways do supervision training interventions enable or inhibit successful supervision,  
22 for whom and in what contexts?  
23
- 24 2) What are the key mechanisms that influence supervision training outcomes?  
25  
26  
27  
28  
29

## 31 **METHODS AND ANALYSIS**

32  
33 The protocol for this review will be registered with the International Prospective Register for  
34 Systematic Reviews (PROSPERO).  
35  
36

### 38 **Study design**

39  
40 This study will be guided by Pawson's<sup>45</sup> five stages for conducting a realist review: (1) clarifying the  
41 scope of the review; (2) determining the search strategy; (3) study selection; (4) extracting data; and  
42 (5) synthesising the evidence and drawing conclusions. Although presented in a linear way here, the  
43 review process is iterative in nature and therefore may not follow this process precisely. The findings  
44 of this synthesis will be written up according to the RAMESES publication standards for realist  
45 syntheses.<sup>49</sup>  
46  
47  
48  
49  
50  
51  
52  
53  
54  
55  
56  
57  
58  
59  
60

## Clarifying scope of the synthesis/Identify existing theories

The first stage of our realist synthesis will be to: (a) identify the synthesis question; (b) refine the purpose of the synthesis; and (c) articulate the key theories to be explored. The research team will conduct a scoping exercise of the current supervision training literature, which will generate a number of potential search terms, which can then be used to help define and refine the question based on gaps in knowledge in the empirical literature. The scoping exercise will help in identifying the circumstances for supervision training use and the nature and context of supervision training in the health and human services workforce. The purpose and focus of the search will be to articulate initial programme theories embedded within the literature about how and why interventions and their components work or fail to work and in what contexts to produce their intended effects.

## Search strategy

A comprehensive search of several relevant databases (i.e. MEDLINE, CINAHL, Scopus, PsycINFO, APAIS, Social Services Abstracts and ERIC) will be conducted. Manual snowballing and citation searches will also be conducted, plus hand searching of the grey literature. Search terms will include 'supervisor' and 'training' terms and their relevant synonyms (see Table 1).

**Table 1 Search terms used for the databases**

| <b>Supervisor Terms</b>           | <b>Training Terms</b>           |
|-----------------------------------|---------------------------------|
| <i>Supervisor*, Supervision</i>   | <i>Education</i>                |
| <i>Practice educator*</i>         | <i>Professional development</i> |
| <i>Clinical educator*</i>         | <i>Educating</i>                |
| <i>Mentor, Mentoring, Mentors</i> | <i>Faculty development</i>      |
| <i>Trainer*</i>                   | <i>"Train the trainer"</i>      |
| <i>Fieldwork educator*</i>        | <i>Personal development</i>     |
| <i>Instructor</i>                 | <i>CPD</i>                      |

|                              |                 |
|------------------------------|-----------------|
| <i>Preceptor, preceptors</i> | <i>Workshop</i> |
| <i>Placement educator</i>    |                 |
| <i>Clinical teacher*</i>     |                 |

## Study selection

Initial assessment of relevance will be carried out by multiple researchers. Titles and/or abstracts of studies retrieved using the search strategy and those from additional sources against preliminary inclusion criteria will be reviewed using the platform Covidence.

The inclusion criteria for studies are as follows: (1) directly relate to one or more of the research questions; (2) relate to the following populations: health, housing, children services, youth and families services, alcohol and drug services and mental health disciplines within the health and human services workforce; (3) directly relate to supervision training interventions (4); literature must be written in the English language; and (5) be primary research and peer reviewed articles only.

The key exclusion criterion is literature relating to research supervision training interventions.

The relevance of an article will not only be judged against the synthesis questions but will also be judged in terms of whether papers can contribute to theory building and/or testing.<sup>49</sup> A second independent researcher will check any ambiguities at this stage (i.e. articles selected as 'maybe' in Covidence). After relevance checks, the full text of the remaining articles will then be retrieved and independently assessed for rigour (researchers will ask, 'are the methods used to generate data credible and trustworthy?'). Multiple researchers will check rigour using either the Medical Education Research Study Quality Instrument (MERSQI)<sup>50 51</sup> (for quantitative studies) or the Critical Appraisal Skills Programme (CASP) qualitative checklist<sup>52</sup> (for qualitative or mixed methods studies). Any disagreements over eligibility based on quality will be resolved through discussion between the researchers, and if this is not possible, an extra reviewer will be brought in to adjudicate. Double-checking will be carried out and discussed for approximately 5% of included and excluded papers at the relevance stage and 10% of the included and excluded papers (at the rigour stage) for quality

control purposes.<sup>53</sup> The assessment of eligibility for inclusion will be an iterative process as the synthesis progresses and new or refined elements of theory may be required to explain or test different aspects of the developing theory/theories. Figure 1 outlines the Preferred Reporting Items for Systematic Reviews and Meta-analysis (PRISMA) process for study selection. The PRISMA diagram will be employed to allow for a clear articulation of the systematic process for this literature review.

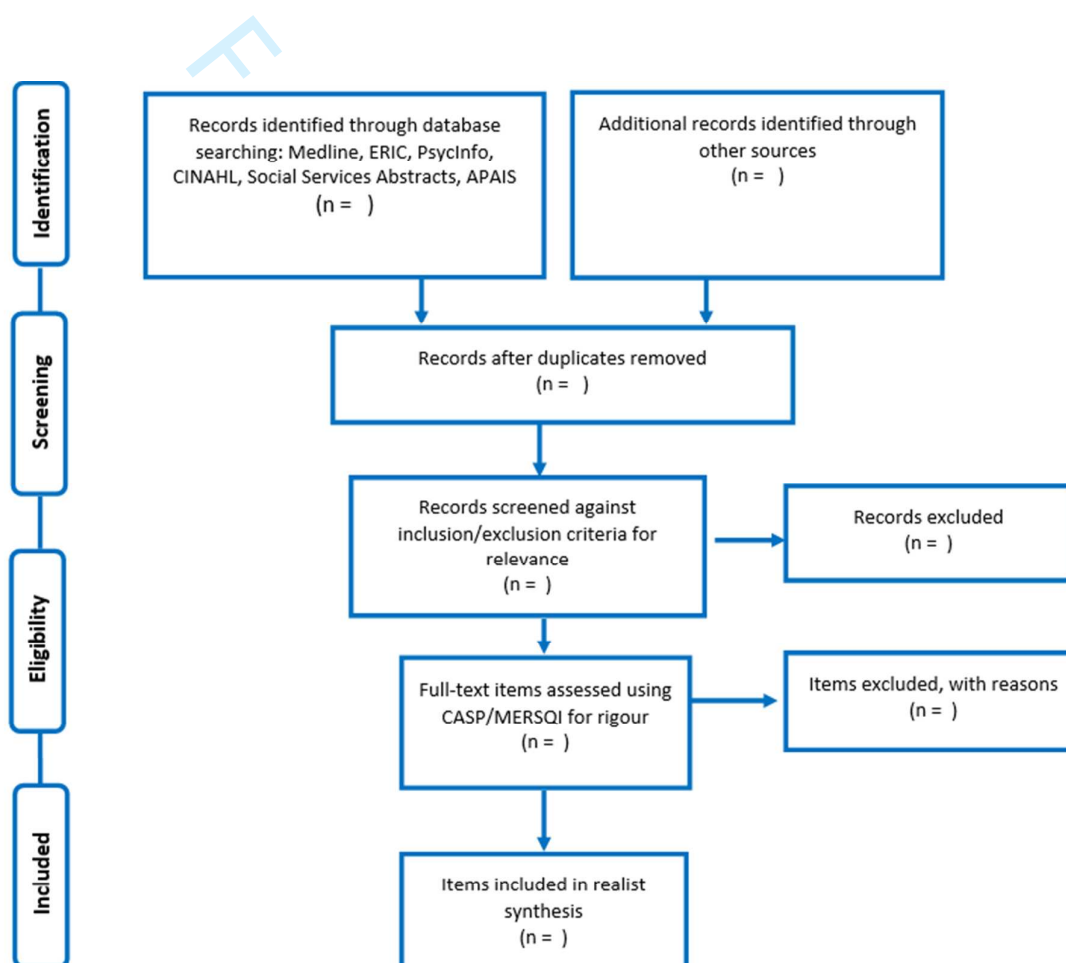

**Figure 1 PRISMA diagram for realist synthesis of supervision training interventions**

## Extracting data

An Excel spreadsheet will be used to document the extracted data from included studies. Given that this study is following a realist synthesis method, the extracted data will include: study

1  
2  
3 characteristics (e.g. publication year, study methodology, etc.); intervention characteristics (e.g.  
4 workshop, reflective practice, seminar, etc.), contexts (e.g. study setting, participants), mechanisms  
5 and outcomes, plus any Context-Mechanism-Outcome (CMO) configurations. A team of reviewers  
6  
7 will extract data with a minimum of 10% of the papers being double-checked, with any discrepancies  
8  
9 being resolved through discussion (with a different reviewer if necessary). The researchers will first  
10  
11 go through the full text of each selected paper adding e-notes identifying contexts, mechanisms,  
12  
13 outcomes and any CMO configurations for each supervision training intervention. That data will  
14  
15 then be transferred to the Excel spreadsheet, thus collating CMOs from across the sample of papers.  
16  
17 It is acknowledged that some articles may not fully describe or provide interventional components  
18  
19 or contexts sufficiently, thereby fully answering the research questions. To elicit this relevant but  
20  
21 unpublished information, the research team will contact the study authors to request detailed  
22  
23 information on certain aspects of interventions, particularly information on contextual factors and  
24  
25 mechanisms that have not been reported. Such information will be added to the extraction  
26  
27 spreadsheet if made available to authors.  
28  
29  
30  
31

### 32 Synthesise findings and draw conclusions

33  
34 An Excel spreadsheet will be used to manage the data and a thematic analysis approach to the  
35  
36 findings will be adopted to synthesise findings. Here, we will look for any patterns across the  
37  
38 included papers in terms of recurrent CMO configurations (so called 'demi-regularities').<sup>47</sup> This  
39  
40 team-based analysis process will enable discussion of the data between researchers to allow further  
41  
42 examination and the development and subsequent refinement of programme theory/theories. The  
43  
44 process of synthesis will include: (1) comparison of findings from different studies; (2) using findings  
45  
46 from studies to address the purpose(s) of the synthesis; (3) seeking both confirmatory and  
47  
48 contradictory findings; (4) refining programme theories in the light of evidence; and (5)  
49  
50 disseminating the review with findings, conclusions and recommendations.<sup>48</sup>  
51  
52  
53  
54  
55  
56  
57  
58  
59  
60

## Ethics and dissemination

Ethics approval is not required for this study as it pertains to a review of existing evidence. The findings of this synthesis will be documented using the RAMESES publication standards for realist syntheses.<sup>49</sup> We expect to disseminate findings via a peer-reviewed journal article, conference presentation(s) and a report to the Victorian Department of Health and Human Services, Australia as the project funding body. The findings have the potential to benefit multiple stakeholders involved in developing, implementing and receiving supervision training, plus can be used to facilitate continuous quality improvement of supervision training interventions and guide further supervision training research in the health and human services professions.

**Twitter** Follow Sarah Lee at @MissSarahLee and Charlotte Rees @charreessidhu

**Acknowledgements** The authors would like to thank Anne Young, Medicine, Nursing & Health Sciences Librarian from the Hargrave-Andrew library, Monash University, for her assistance in the development and conduct of the search strategy.

**Contributors** All authors have contributed to the protocol development. SL carried out the initial scoping exercise, SL and CD wrote the first draft of the manuscript and CR and CP edited several iterations of earlier drafts. Later drafts were checked by SW, KP, VE, KS, and BW, who critically reviewed and refined the protocol further. All authors read and approved the final protocol. SL is conducting this study as part of a PhD, with CR and CP as her supervisors. CR is principal investigator of the study.

**Funding** This work was supported by the Victorian Department of Health and Human Services.

**Competing interests** None declared.

**Ethical approval** This project did not require ethics approval.



1  
2  
3  
4  
5  
6  
7  
8  
9  
10  
11  
12  
13  
14  
15  
16  
17  
18  
19  
20  
21  
22  
23  
24  
25  
26  
27  
28  
29  
30  
31  
32  
33  
34  
35  
36  
37  
38  
39  
40  
41  
42  
43  
44  
45  
46  
47  
48  
49  
50  
51  
52  
53  
54  
55  
56  
57  
58  
59  
60

**Data sharing** Not applicable to this study.

**Patient consent** Not applicable to this study.

For peer review only

## References

1. Falender CA, Cornish JAE, Goodyear R, et al. Defining competencies in psychology supervision: A consensus statement. *Journal of Clinical Psychology* 2004;60(7):771-85.
2. Falender CA, Shafranske EP. Clinical supervision: A competency-based approach. Washington, DC: American Psychological Association 2004.
3. Kilminster SM, Jolly BC. Effective supervision in clinical practice settings: a literature review. *Medical Education* 2000;34(10):827-40.
4. Proctor B. Supervision: a co-operative exercise in accountability, enabling and ensuring. *Leicester National Youth Bureau and Council for Education and Training in Youth Work, Leicester* 1986:21-24.
5. Proctor B. Supervision—competence, confidence, accountability. *British Journal of Guidance & Counselling* 1994;22(3):309-18.
6. Brunero S, Stein-Parbury J. The effectiveness of clinical supervision in nursing: an evidenced based literature review. *Australian Journal of Advanced Nursing* 2008;25(3):86-94.
7. Jones A. Clinical supervision: a framework for practice. *International Journal of Psychiatric Nursing Research* 1996;3:290-307.
8. Knudsen HK, Ducharme LJ, Roman PM. Clinical supervision, emotional exhaustion, and turnover intention: A study of substance abuse treatment counselors in the Clinical Trials Network of the National Institute on Drug Abuse. *Journal of Substance Abuse Treatment* 2008;35(4):387-95.
9. Martin P, Copley J, Tyack Z. Twelve tips for effective clinical supervision based on a narrative literature review and expert opinion. *Medical Teacher* 2014;36(3):201-07.
10. Hall T, Cox D. Clinical supervision: an appropriate term for physiotherapists? *Learning in Health and Social Care* 2009;8(4):282-91.
11. Diane C, Gonzalo A. The experience of therapy supervision within a UK multi-centre randomized controlled trial. *Learning in Health and Social Care* 2009;8(4):301-14.
12. Hunter EP, Blair SE. Staff supervision for occupational therapists. *British Journal of Occupational Therapy* 1999;62(8):344-50.
13. Edwards D, Cooper L, Burnard P, et al. Factors influencing the effectiveness of clinical supervision. *Journal of Psychiatric and Mental Health Nursing* 2005;12(4):405-14.
14. Fowler J. Supporting self and others: from staff nurse to nurse consultant. Part 5: Clinical supervision. *British Journal of Nursing* 2011;20(13):830-30.
15. Jones A. Clinical supervision: what do we know and what do we need to know? A review and commentary. *Journal of Nursing Management* 2006;14(8):577-85.
16. Dilworth S, Higgins I, Parker V, et al. Finding a way forward: A literature review on the current debates around clinical supervision. *Contemporary Nurse* 2013;45(1):22-32.
17. Kleiser H, Cox DL. The integration of clinical and managerial supervision: a critical literature review. *British Journal of Occupational Therapy* 2008;71(1):2-12.
18. Edwards D, Burnard P, Hannigan B, et al. Clinical supervision and burnout: the influence of clinical supervision for community mental health nurses. *Journal of Clinical Nursing* 2006;15(8):1007-15.
19. McLean M, Cilliers F, Van Wyk JM. Faculty development: yesterday, today and tomorrow. *Medical Teacher* 2008;30(6):555-84.
20. Sutkin G, Wagner E, Harris I, et al. What makes a good clinical teacher in medicine? A review of the literature. *Academic Medicine* 2008;83(5):452-66.
21. Jochemsen-van der Leeuw HR, van Dijk N, van Etten-Jamaludin FS, et al. The attributes of the clinical trainer as a role model: a systematic review. *Academic Medicine* 2013;88(1):26-34.
22. Hoffman LW. The Training of Psychotherapy Supervisors. *Psychotherapy in Private Practice* 1994;13(1):23-42.
23. Simpson S, Sparkes C. Are you getting enough? - (2) Supervision Models and Barriers. *Speech and Language Therapy in Practice* 2008:18-19.

- 1
  - 2
  - 3
  - 4
  - 5
  - 6
  - 7
  - 8
  - 9
  - 10
  - 11
  - 12
  - 13
  - 14
  - 15
  - 16
  - 17
  - 18
  - 19
  - 20
  - 21
  - 22
  - 23
  - 24
  - 25
  - 26
  - 27
  - 28
  - 29
  - 30
  - 31
  - 32
  - 33
  - 34
  - 35
  - 36
  - 37
  - 38
  - 39
  - 40
  - 41
  - 42
  - 43
  - 44
  - 45
  - 46
  - 47
  - 48
  - 49
  - 50
  - 51
  - 52
  - 53
  - 54
  - 55
  - 56
  - 57
  - 58
  - 59
  - 60
24. Strong J, Kavanagh D, Wilson J, et al. Supervision Practice for Allied Health Professionals Within a Large Mental Health Service. *The Clinical Supervisor* 2004;22(1):191-210.
25. Geller E, Foley GM. Broadening the “ports of entry” for speech-language pathologists: A relational and reflective model for clinical supervision. *American Journal of Speech-Language Pathology* 2009;18(1):22-41.
26. Kaufman J, Schwartz T. Models of supervision: Shaping professional identity. *The Clinical Supervisor* 2004;22(1):143-58.
27. Kavanagh DJ, Spence SH, Wilson J, et al. Achieving effective supervision. *Drug & Alcohol Review* 2002;21(3):247-52.
28. Siggins M. Promoting Quality in Clinical Placements: Literature Review and National Stakeholder Consultation. Adelaide, Australia: Health Workforce Australia, 2012.
29. Davys A, Beddoe L. Best practice in professional supervision: A guide for the helping professions. London, UK: Jessica Kingsley Publishers, 2010.
30. Anderson J. Training of supervisors in speech-language pathology and audiology. *American Speech-Language-Hearing Association* 1981;23(2):77-82.
31. Dowling S. Implementing the supervisory process: Theory and practice: Englewood Cliffs, NJ: Prentice-Hall, 1992.
32. American Speech-Language-Hearing Association. Clinical supervision in speech-language pathology. Available at: <https://www.asha.org>, Accessed: July 2008.
33. Milne DL, Sheikh AI, Pattison S, et al. Evidence-Based Training for Clinical Supervisors: A Systematic Review of 11 Controlled Studies. *The Clinical Supervisor* 2011;30(1):53-71.
34. Russell RK, Petrie T. Issues in training effective supervisors. *Applied and Preventive Psychology* 1994;3(1):27-42.
35. Whitman SM, Ryan B, Rubenstein DF. Psychotherapy Supervisor Training. *Academic Psychiatry* 2001;25(3):156-61.
36. McMahon M, Simons R. Supervision Training for Professional Counselors: An Exploratory Study. *Counselor Education and Supervision* 2004;43(4):301-09.
37. Gaitskell S, Morley M. Supervision in Occupational Therapy: How are We Doing? *British Journal of Occupational Therapy* 2008;71(3):119-21.
38. Gonsalvez CJ, Milne DL. Clinical supervisor training in Australia: A review of current problems and possible solutions. *Australian Psychologist* 2010;45(4):233-42.
39. Bernard JM, Goodyear RK. Fundamentals of clinical supervision, 3rd ed. Needham Heights, MA, US: Allyn & Bacon, 2004.
40. Tsutsumi A. Development of an Evidence-based Guideline for Supervisor Training in Promoting Mental Health: Literature Review. *Journal of Occupational Health* 2011;53(1):1-9.
41. Sholl S, Ajjawi R, Allbutt H, et al. Balancing health care education and patient care in the UK workplace: a realist synthesis. *Medical education* 2017;51(8):787-801.
42. Ajjawi R, Crampton PES, Rees CE. What really matters for succesful research environments? A realist synthesis. *Medical Education* 2018 doi: 10.1111/medu.13643
43. Wong G, Westthorp G, Greenhalgh J, et al. Quality and reporting standards, resources, training materials and information for realist evaluation: the RAMESES II project. *Health Services and Delivery Research* 2017;5(28)
44. Kent F, Hayes J, Glass S, et al. Pre-registration interprofessional clinical education in the workplace: a realist review. *Medical Education* 2017;51(9):903-17.
45. Pawson R, Greenhalgh T, Harvey G, et al. Realist review-a new method of systematic review designed for complex policy interventions. *Journal of Health Services Research & Policy* 2005;10:21-34.
46. Kent F, Hayes J, Glass S, et al. Pre-registration interprofessional clinical education in the workplace: a realist review. *Medical education* 2017;51(9):903-17.
47. Pawson R, Tilley N. An introduction to scientific realist evaluation. Evaluation for the 21st century: A handbook. Thousand Oaks, CA, US: Sage Publications, Inc 1997:405-18.

- 1  
2  
3 48. Pawson R, Greenhalgh T, Harvey G, et al. Realist synthesis: an introduction. *Manchester: ESRC*  
4 *Research Methods Programme, University of Manchester* 2004  
5 49. Wong G, Greenhalgh T, Westhorp G, et al. RAMESES publication standards: realist syntheses.  
6 *BMC Medicine* 2013;11(1):21.  
7 50. Reed DA, Beckman TJ, Wright SM. An assessment of the methodologic quality of medical  
8 education research studies published in *The American Journal of Surgery*. *The American*  
9 *Journal of Surgery* 2009;198(3):442-44.  
10 51. Cook DA, Reed DA. Appraising the quality of medical education research methods: the medical  
11 education research study quality instrument and the Newcastle–Ottawa Scale-Education.  
12 *Academic Medicine* 2015;90(8):1067-76.  
13 52. Critical Appraisal Skills Programme (CASP) Qualitative Research Checklist Checklist. Available at:  
14 <http://www.casp-uk.net/casp-tools-checklists/> 2018.  
15 53. Brennan N, Bryce M, Pearson M, et al. Understanding how appraisal of doctors produces its  
16 effects: a realist review protocol. *BMJ Open* 2014;4(6):e005466.  
17  
18  
19  
20  
21  
22  
23  
24  
25  
26  
27  
28  
29  
30  
31  
32  
33  
34  
35  
36  
37  
38  
39  
40  
41  
42  
43  
44  
45  
46  
47  
48  
49  
50  
51  
52  
53  
54  
55  
56  
57  
58  
59  
60

# BMJ Open

## Supervision training interventions in the health and human services: a realist synthesis protocol

|                                 |                                                                                                                                                                                                                                                                                                                                                                                                                                                                                                                                                                                                                                                                                                                                                                                                                                                                                                                                                            |
|---------------------------------|------------------------------------------------------------------------------------------------------------------------------------------------------------------------------------------------------------------------------------------------------------------------------------------------------------------------------------------------------------------------------------------------------------------------------------------------------------------------------------------------------------------------------------------------------------------------------------------------------------------------------------------------------------------------------------------------------------------------------------------------------------------------------------------------------------------------------------------------------------------------------------------------------------------------------------------------------------|
| Journal:                        | <i>BMJ Open</i>                                                                                                                                                                                                                                                                                                                                                                                                                                                                                                                                                                                                                                                                                                                                                                                                                                                                                                                                            |
| Manuscript ID                   | bmjopen-2018-025777.R1                                                                                                                                                                                                                                                                                                                                                                                                                                                                                                                                                                                                                                                                                                                                                                                                                                                                                                                                     |
| Article Type:                   | Protocol                                                                                                                                                                                                                                                                                                                                                                                                                                                                                                                                                                                                                                                                                                                                                                                                                                                                                                                                                   |
| Date Submitted by the Author:   | 24-Jan-2019                                                                                                                                                                                                                                                                                                                                                                                                                                                                                                                                                                                                                                                                                                                                                                                                                                                                                                                                                |
| Complete List of Authors:       | Lee, Sarah; Monash University, Faculty of Medicine, Nursing & Health Sciences, Monash Centre for Scholarship in Health Education (MCSHE) Denniston, Charlotte; Monash University, Monash Centre for Scholarship in Health Education (MCSHE); The University of Melbourne, Melbourne Medical School, Department of Medical Education<br>Edouard, Vicki; Monash University, Faculty of Medicine, Nursing & Health Sciences, Monash Centre for Scholarship in Health Education (MCSHE)<br>Palermo, Claire; Monash University, Faculty of Medicine, Nursing & Health Sciences, Monash Centre for Scholarship in Health Education (MCSHE)<br>Pope, Kirsty; Monash University, Department of Occupational Therapy<br>Sutton, Keith; Monash University, Rural Health<br>Waller, Susan; Monash University, Rural Health<br>Ward, Bernadette; Monash University, Rural Health<br>Rees, Charlotte; Monash University, Faculty of Medicine, Nursing & Health Sciences |
| <b>Primary Subject Heading</b>: | Evidence based practice                                                                                                                                                                                                                                                                                                                                                                                                                                                                                                                                                                                                                                                                                                                                                                                                                                                                                                                                    |
| Secondary Subject Heading:      | Health services research                                                                                                                                                                                                                                                                                                                                                                                                                                                                                                                                                                                                                                                                                                                                                                                                                                                                                                                                   |
| Keywords:                       | Supervision, Realist Synthesis, Education, Training                                                                                                                                                                                                                                                                                                                                                                                                                                                                                                                                                                                                                                                                                                                                                                                                                                                                                                        |
|                                 |                                                                                                                                                                                                                                                                                                                                                                                                                                                                                                                                                                                                                                                                                                                                                                                                                                                                                                                                                            |

SCHOLARONE™  
Manuscripts

1  
2  
3 **Supervision training interventions in the health and human services: a realist synthesis protocol**  
4

5  
6 Sarah Lee,<sup>1</sup> Charlotte Denniston,<sup>1,2,3</sup> Vicki Edouard,<sup>1</sup> Claire Palermo,<sup>1</sup> Kirsty Pope,<sup>4</sup> Keith Sutton,<sup>5</sup>  
7

8 Susan Waller,<sup>5</sup> Bernadette Ward,<sup>6</sup> Charlotte E Rees<sup>1</sup>  
9

10  
11  
12  
13  
14 <sup>1</sup>Monash Centre for Scholarship in Health Education (MCSHE), Monash University, Clayton, Australia  
15

16  
17 <sup>2</sup>Department of Medical Education, Melbourne University, Melbourne, Australia  
18

19  
20 <sup>3</sup>College of Intensive Care Medicine of Australia and New Zealand, Prahran, Australia  
21

22  
23 <sup>4</sup>Department of Occupational Therapy, Monash University, Frankston, Australia  
24

25  
26 <sup>5</sup>Monash Rural Health, Newborough, Monash University, Australia  
27

28  
29 <sup>6</sup>Monash Rural Health, Bendigo, Monash University, Australia  
30

31  
32  
33  
34 **Correspondence to:**  
35

36  
37  
38 Sarah Lee, Monash Centre for Scholarship in Health Education (MCSHE), Monash University, 27  
39

40 Rainforest Walk, Room 321, Clayton Campus, VIC 3800, Australia; Tel: +61 (0)3 9905 1910;  
41

42 Email: sarah.lee1@monash.edu  
43  
44  
45  
46  
47  
48  
49  
50  
51  
52  
53  
54  
55  
56  
57  
58  
59  
60

## ABSTRACT

**Introduction:** Supervision training aims to develop workplace supervisory competencies. Despite extensive supervision literature, including literature reviews, the processes through which supervision training interventions produce their effects, for whom, and under what circumstances is not clearly delineated. The purpose of this study is to explain the effect of contextual factors on the underpinning mechanisms of supervision training outcomes.

**Methods and analysis:** We propose to examine supervision training interventions across the health and human services workforce using realist methods. Pawson's five stages for undertaking a realist synthesis will be followed: (1) clarifying the scope of the review; (2) determining the search strategy; (3) study selection; (4) extracting data; and (5) synthesising the evidence and drawing conclusions. Extracted data will include study characteristics, characteristics of participant cohort, intervention type, contextual factors, underlying mechanisms and supervision training outcomes. Patterns in context-mechanism-outcome configurations will be identified. Initial programme theories will be developed based on a comprehensive search of the literature, which will include key terms relating to supervision and training. The search strategy will involve: (1) electronic database searching using Medline, CINAHL, Social Services Abstracts, ERIC, PsycINFO and APAIS; and (2) hand and citation searching. We will also contact authors where necessary and discuss identified literature amongst the project team with extensive expertise in supervision training. **Ethics and Dissemination:** The realist synthesis will propose an evidence-informed theory of supervision training interventions (i.e. what interventions work for whom and why). The findings will be disseminated in peer-reviewed journals and presentations and through discussions with relevant organisations and stakeholders. The research will be utilised by educators to develop evidenced-based supervision training interventions. It will also help workplace supervisors to better understand what types of supervision training might work most optimally for them and their colleagues. Other researchers could use the synthesis findings to guide future supervision research.

### Strengths and limitations of this study

- This synthesis will identify how and why components of supervision training are effective (or not) within various settings in the health and human services workforce, rather than merely focusing on whether supervision training is effective.
- A large multidisciplinary research team lends high quality relevance and rigour checks and more comprehensive data interpretation.
- The realist synthesis is well suited to the evaluation of complex interventions such as supervision training.
- Only English language studies will be included, so findings might lack transferability to supervision training interventions in non-English speaking countries.
- Search terms for supervision that are less frequently used in the health and human services (e.g. critical companion) may be omitted, meaning that some evidence may be missed.



## INTRODUCTION

Supervision is a distinct professional activity characterised by the training and professional development of supervisees,<sup>1,2</sup> and in some literature is understood to be partly hierarchical and evaluative.<sup>3</sup> Although the definition of supervision varies in terms of its purposes, arguably one of the most widely adopted models describing the purpose and functions of supervision is that of Proctor,<sup>4</sup> who outlined three functions of supervision: normative (managerial), formative (educational) and restorative (supportive). The normative function depicts the role that supervision plays as a process for ensuring ethical, acceptable and quality practice.<sup>5</sup> The formative function of supervision encompasses developmental aspects such as gaining knowledge, communication skills, trust in self and confidence.<sup>6</sup> The restorative function focuses on providing support to alleviate burnout and stress.<sup>7</sup> All three functions highlight supervision as a protective factor in professional practice.<sup>8</sup> Note that Proctor's depiction of supervision has been used in this study to help guide our understanding and definition of supervision.

A guideline for what constitutes effective supervision for both the supervisor and supervisee has been outlined in the literature.<sup>9</sup> Effective supervision has been described to include but is not limited to: supervisees choosing their own supervisors,<sup>10</sup> deciding on the most suitable types of supervision (e.g. one-to-one or peer group supervision or a combination of both),<sup>11</sup> establishing a supervision agreement or contract and using a supervision agenda,<sup>12</sup> choosing venues away from supervisees' workplaces to conduct supervision sessions, having an optimal meeting length and frequency (e.g. at least one hour every four weeks),<sup>13</sup> using effective communication and feedback<sup>14</sup>, facilitating reflective practice, use of more than one mode for distance supervision, building a positive supervisory relationship (e.g. one that is positive, supportive, trustworthy, non-judgmental and encouraging),<sup>10,12</sup> separating clinical supervision from line management, undertaking training in supervision and evaluating supervision (either through formal or informal methods).<sup>15</sup>

1  
2  
3 Effective supervision is that which has positive outcomes across all levels of an organisation,<sup>16</sup>  
4 including for the client/patient (e.g. improved client/patient outcomes), and the organisation as a  
5 whole (e.g. improved standards and quality of service delivery).<sup>9 12</sup> Benefits of effective supervision  
6  
7 for practitioners include developing capability and knowledge,<sup>17</sup> reducing burnout,<sup>18</sup> and assisting  
8 practitioners to cope better with their work and workplace.<sup>13</sup> When conducted effectively,  
9 supervision can provide an opportunity for practitioners to reflect on their practice and establish  
10 new approaches to supervision.<sup>9</sup> While effective supervision and its outcomes have been clearly  
11 delineated in the literature,<sup>19-21</sup> the same attention has not been afforded to what constitutes  
12 effective training for supervisors.<sup>2 22</sup>

13  
14 This realist synthesis protocol focuses on supervision practiced in both the broad domains of health  
15 and human services given that it is part of a broader programme of research investigating  
16 supervision training in these wide-ranging settings including: health, housing, children services,  
17 youth and family services, alcohol and drug services and mental health. Although Proctor's model of  
18 supervision has been used to guide our understanding of supervision in the health and human  
19 services, any outcomes of supervision training will be explored in this study including both positive  
20 and negative outcomes at individual, interpersonal and organisation levels. What follows is a brief  
21 outline of: i) the characteristics of supervision within these settings; and ii) the different modes of  
22 supervision training commonly implemented to support supervisors within these settings.

## 23 24 25 26 27 28 29 30 31 32 33 34 35 36 37 38 39 40 41 42 43 44 45 **Supervision in the health and human services**

46  
47 Literature within health and human services predominately describes supervision as an educative  
48 process. For the most part, the literature embraces the formative and restorative functions of  
49 Proctor's model, thereby characterising supervision as both a platform for practitioners to develop  
50 knowledge, and a method of professional support.<sup>18 23</sup> However, within mental health settings, the  
51 normative function of supervision is typically privileged, with supervision considered as an important  
52 factor in ensuring staff ability and enabling best practice outcomes for consumers and carers.<sup>24</sup>

1  
2  
3 Other allied health professions, such as physiotherapy and speech therapy, report using discipline-  
4 specific supervisory models for a combination of normative, formative *and* restorative functions.<sup>10 25</sup>

5  
6  
7  
8  
9  
10  
11  
12  
13  
14  
15  
16  
17  
18  
19  
20  
21  
22  
23  
24  
25  
26  
27  
28  
29  
30  
31  
32  
33  
34  
35  
36  
37  
38  
39  
40  
41  
42  
43  
44  
45  
46  
47  
48  
49  
50  
51  
52  
53  
54  
55  
56  
57  
58  
59  
60

26

In terms of the human services workforce, in some areas of the workforce like alcohol and other drug services, the empirical evidence for the function of supervision is sparse.<sup>27</sup> Supervision for human services workers appears more complex due to the vast array of diverse settings in which these professionals work. Consequently, there seems to be a multiplicity of definitions, models and applications of supervision within this literature,<sup>28 29</sup> mirroring the broader supervision literature discussed above.

## Supervision training

Supervision training is a common way to support supervisors and prepare them for their supervisory roles within health and human services. Supervision training is typically a process for enhancing supervisor behaviour to improve the outcomes of the supervisory process.<sup>30 31</sup> Current literature suggests that there is a variety of training methods used to support the development of effective supervisors.<sup>32 33</sup> Supervision training can be in the form of formal training (e.g. face-to-face or online workshops and/or seminars), training received informally (e.g. role-modelling and observation), and/or self-directed learning (e.g. guided reading).<sup>33</sup> Supervisors typically receive little or no formal training for their supervision role and little is known about how supervisors acquire knowledge and aptitude in the supervisory role.<sup>33</sup> Supervisor training is rarely empirically or theoretically grounded,<sup>3</sup> and it appears that most professionals learn supervisor skills by assimilating their own experiences as supervisees or through informal methods (e.g. observation). The process of learning to be a supervisor therefore often occurs by default.<sup>34</sup>

Inadequate attention to supervision outcomes, supervision training and supervision research, however, has started to raise concerns about the quality of supervision delivered across a number of

1  
2  
3 different disciplines.<sup>35 27 36 37</sup> The assumption that experience as a practitioner or a supervisee  
4 translates into becoming an effective supervisor is, of course, erroneous.<sup>38</sup> Indeed, there is a  
5 distinction between practitioner skills and supervisor skills,<sup>33</sup> and specific training to develop  
6 supervisory skills is crucial.  
7  
8  
9

10  
11  
12 While there is broad understanding about what constitutes effective supervision,<sup>19-21</sup> little attention  
13 has been paid to what constitutes effective *training* of supervisors.<sup>22</sup> Therefore, insufficient clarity  
14 still exists regarding how supervisors should be trained to become effective supervisors.<sup>33</sup> It has  
15 been said that: 'research on the effectiveness of supervision training remains virtually non-  
16 existent'.<sup>39, p219</sup>  
17  
18  
19  
20  
21  
22  
23

24  
25 Three reviews (two systematic, one narrative) regarding supervision training have been published  
26 since 2004,<sup>33 38 40</sup> and these provide a useful starting point to understand supervision training.  
27  
28 Firstly, Gonsalvez and Milne<sup>38</sup> conducted a narrative review of clinical supervision training changes in  
29 professional psychology within Australia, both examining and addressing solutions to emerging  
30 problems. Gonsalvez and Milne identified a need for better regulation of supervisory practice within  
31 psychology and recommended that supervisory practice be supported with enhanced development  
32 of resources (e.g. manuals, workbooks and better psychometric tools to evaluate supervisory  
33 processes). Secondly, Milne et al.<sup>33</sup> conducted a systematic review of controlled trials of supervision  
34 interventions and found clear empirical support for supervisor training; training which when  
35 effective could help to bridge the gap between policy and practice, and ensure that therapies within  
36 the mental health field are implemented with fidelity. This review also helps us to understand the  
37 complexity and diversity of supervisor training. For example, they found 56 supervisor-training  
38 methods were used across the 11 studies reviewed. Training methods included: workshops, role-  
39 play, modelling, guided reading, direct observation and/or teaching (through verbal instruction).  
40  
41 Finally, Tsutsumi's<sup>40</sup> systematic review, including 7 controlled studies assessing the effect of  
42 supervisor training on the mental health of subordinate workers, proposed an evidenced-based  
43  
44  
45  
46  
47  
48  
49  
50  
51  
52  
53  
54  
55  
56  
57  
58  
59  
60

1  
2  
3 guideline for supervisor training, which included: what training content should include, the aim (e.g.  
4 behaviour modification among supervisors), frequency of training (i.e. yearly) and the target  
5 population for training (e.g. all supervisors). The guideline aimed to improve the mental health of  
6 workers by ensuring that all supervisors were trained and would therefore be better equipped to  
7 support the mental health of their workers.  
8  
9

10  
11  
12 While these reviews have made a helpful start in illustrating what effective supervision training can  
13 look like, they have their limitations. For example, these reviews do not include recently published  
14 papers (i.e. papers published from 2010 onwards), they only include a small number of papers (i.e.  
15 two systematic reviews with 7 and 11 controlled studies respectively,<sup>40 33</sup> and one narrative review  
16 which did not clearly indicate the number of papers reviewed).<sup>38</sup> Additionally, these previous  
17 reviews tend to focus either on the mental health setting only or on supervisory support for workers'  
18 mental health, thereby failing to explore supervision training across a diverse range of health and  
19 human services professions. Furthermore, none of these reviews explore the extent to which  
20 supervision training interventions produce their effects, how, for whom and under what contexts.  
21 Therefore, the synthesis described in this protocol aims to address this gap in knowledge. Utilising a  
22 realist approach, this study will allow interpretability of findings across different contexts and will  
23 address the question of what supervision training interventions work, for whom, under what  
24 circumstances, how and why.  
25  
26  
27  
28  
29  
30  
31  
32  
33  
34  
35  
36  
37  
38  
39  
40  
41  
42  
43  
44

## 45 **Realist synthesis methodology**

46  
47  
48 Traditional methodological approaches to evaluating interventions, such as randomised controlled  
49 trials (RCTs), are orientated towards conceptually simple questions of causality such as: 'is this  
50 intervention effective or not?' Such a question of causality tends to be better suited to clinical  
51 treatments rather than complex health and education interventions such as supervision training.  
52  
53 Realist methodology, therefore, is being used increasingly to study the workings of complex health  
54 and education interventions.<sup>41-46</sup> Realist approaches privilege context in the evaluation of  
55  
56  
57  
58  
59  
60

1  
2  
3 interventions. For example, a realist approach acknowledges that an intervention that works well  
4 within any given healthcare service (e.g. supervision training for doctors), may not work well within a  
5 human service setting in the community (e.g. supervision training for housing or child protection  
6 professionals). Therefore, understanding contextual variation and how this impacts the effectiveness  
7 (or otherwise) of an intervention is crucial to the development and implementation of complex  
8 interventions. This review will be underpinned by scientific realism, which is a logic of inquiry that  
9 generates distinct research strategies and utilises research methods and techniques within these to  
10 ascertain an in-depth understanding of causality.<sup>47</sup> Such realism will help us to unpack and  
11 synthesise hidden mechanisms at play within primary studies, thus allowing us to gain deeper  
12 understandings about how supervisor training as a complex programme works or fails to work, and  
13 why in our chosen different settings.<sup>38</sup>

## 28 **Study aim and research questions**

31 This study aims to address the ways in which supervision training interventions impact and influence  
32 supervisory practice, for whom and under what circumstances, how and why. The research  
33 questions for this realist synthesis protocol are as follows:

- 34 1) In what ways do supervision training interventions enable or inhibit successful supervision,  
35 for whom and in what contexts?
- 36 2) What are the key mechanisms that influence supervision training outcomes?

## 48 **METHODS AND ANALYSIS**

51 The protocol for this review is registered with the International Prospective Register for Systematic  
52 Reviews (PROSPERO: registration number CRD42018094186).

## Study design

This study will be guided by Pawson's<sup>46</sup> five stages for conducting a realist review: (1) clarifying the scope of the review; (2) determining the search strategy; (3) study selection; (4) extracting data; and (5) synthesising the evidence and drawing conclusions. Although presented in a linear way here, the review process is iterative in nature and therefore may not follow this process precisely. The findings of this synthesis will be written up according to the RAMESES publication standards for realist syntheses.<sup>48</sup>

### Clarifying scope of the synthesis/Identify existing theories

The first stage of our realist synthesis will be to: (a) refine the purpose of the synthesis; and (b) identify any key theories to be explored. The research team, with the help of a medical librarian, will refine the purpose and identify any key theories through first scoping the current supervision training literature. This will involve creating a matrix identifying existing primary literature, literature reviews, search terms and their synonyms. The lead author will work with the medical librarian to run pilot searches through several databases to test search terms, Boolean operators and proximity searching. These pilot searches will be used to help refine the research questions based on any gaps in knowledge in the empirical literature. This scoping exercise will help in starting to identify the circumstances for supervision training use and the nature of supervision training in the health and human services workforces. While this scoping exercise may start to identify initial programme theories about how and why interventions work (or fail to work) and in what contexts, we anticipate developing programme theories through later stages of our realist synthesis (for example, see 'extraction' later).

## Search strategy

A comprehensive search of the literature will be conducted in MEDLINE (Ovid), Cumulative Index to Nursing and Allied Health Literature (CINAHL Plus, Ebsco), Scopus, PsycINFO (Ovid), Australian Public Affairs Information Service (APAIS, Informit), Social Services Abstracts (ProQuest) and Educational Resources Information Center (ERIC, ProQuest) by the lead author, with input from a medical librarian and co-authors. Citations and reference lists of included studies will be checked to identify additional relevant studies.

An extensive range of search terms relating to 'supervisors' or 'supervision' and 'training' (see Table 1) will be tested and combined with proximity searching, Boolean operators, truncations and asterisks. An example of a Medline (Ovid) search strategy is included in Box 1.

**Table 1 Search terms to be used for the databases**

| Supervisor Terms                  | Training Terms                  |
|-----------------------------------|---------------------------------|
| <i>Supervisor*, Supervision</i>   | <i>Education</i>                |
| <i>Practice educator*</i>         | <i>Professional development</i> |
| <i>Clinical educator*</i>         | <i>Educating</i>                |
| <i>Mentor, Mentoring, Mentors</i> | <i>Faculty development</i>      |
| <i>Trainer*</i>                   | <i>"Train the trainer"</i>      |
| <i>Fieldwork educator*</i>        | <i>Personal development</i>     |
| <i>Instructor</i>                 | <i>CPD</i>                      |
| <i>Preceptor, preceptors</i>      | <i>Workshop</i>                 |
| <i>Placement educator</i>         |                                 |
| <i>Clinical teacher*</i>          |                                 |

Asterisk (\*) is used to search for both plural and non-plural, for example, *trainer\** would search for both *trainer* and *trainers*.



Searches will be adapted to account for the different functions of each database (see Box 1 for an illustrative Medline search).

### Box 1 An illustrative Medline search

(supervisor\* OR mentors OR mentor OR mentoring OR instructor\* OR placement educator\* OR practice educator\* OR trainer\* OR preceptor OR preceptors OR clinical teacher\* OR clinical educator\* OR fieldwork educator\*) ADJ3 (training OR education OR educating OR workshop\*)

OR

Supervision ADJ (training OR education OR educating OR workshop\*)

OR

“train the trainer\*”

OR

(professional development OR faculty development OR personal development OR CPD) ADJ3 (supervisor\* OR mentors OR mentor OR mentoring OR instructor\* OR placement educator\* OR practice educator\* OR trainer\* OR preceptor OR preceptors OR clinical teacher\* OR clinical educator\* OR fieldwork educator\*)

### Study selection

Initial assessment of relevance will be carried out by multiple researchers. Titles and/or abstracts of studies retrieved using the search strategy, and those from additional sources against preliminary inclusion criteria, will be reviewed using the platform Covidence.

The inclusion criteria for studies are as follows: (1) directly relate to one or more of the research questions; (2) relate to the following populations: health, housing, children services, youth and families services, alcohol and drug services and mental health disciplines within the health and human services workforces; (3) directly relate to supervision training interventions (4); literature must be written in the English language; and (5) be primary research and peer-reviewed articles only. Note that while we decided to include only peer-reviewed articles in our synthesis rather than grey literature (due to the vast literature on supervision training), we intend to employ grey literature to make sense of our synthesis findings, plus we intend to use grey literature for a

1  
2  
3 subsequent realist evaluation of a supervision training programme. The key exclusion criterion is  
4 literature relating to *research* supervision training interventions.  
5  
6  
7  
8  
9

10 The relevance of an article will not only be judged against the synthesis questions but will also be  
11 judged in terms of whether papers can contribute to theory building.<sup>48,49</sup> A second independent  
12 researcher will check any ambiguities at this stage (i.e. articles selected as 'maybe' in Covidence).  
13  
14 After relevance checks, the full text of the remaining articles will then be retrieved and  
15  
16 independently assessed for rigour (researchers will ask, 'are the methods used to generate data  
17 credible and trustworthy?').<sup>49</sup> Multiple researchers will check rigour using either the Medical  
18  
19 Education Research Study Quality Instrument (MERSQI)<sup>50,51</sup> (for quantitative studies) or the Critical  
20  
21 Appraisal Skills Programme (CASP) qualitative checklist<sup>52</sup> (for qualitative or mixed methods studies).  
22  
23 Any disagreements over eligibility based on quality will be resolved through discussion between the  
24  
25 researchers, and if this is not possible, an extra reviewer will be brought in to adjudicate. Double-  
26  
27 checking will be carried out and discussed for approximately 5% of included and excluded papers at  
28  
29 the relevance stage and 10% of the included and excluded papers at the rigour stage for quality  
30  
31 control purposes.<sup>53</sup> The assessment of eligibility for inclusion will be an iterative process as the  
32  
33 synthesis progresses and new or refined elements of theory may be required to explain different  
34  
35 aspects of the developing theory/theories. Figure 1 outlines the Preferred Reporting Items for  
36  
37 Systematic Reviews and Meta-analysis (PRISMA) process for study selection. The PRISMA diagram  
38  
39 will be employed to allow for a clear articulation of the systematic process for this literature review.  
40  
41  
42  
43  
44  
45  
46  
47  
48  
49  
50  
51  
52

53 **Figure 1 PRISMA diagram for realist synthesis of supervision training interventions**  
54  
55  
56  
57  
58  
59  
60

## Extracting data

An Excel spreadsheet will be used to document the extracted data from included studies. Given that this study is following a realist synthesis method, the extracted data will include: study characteristics (e.g. publication year, study methodology, etc.); types of participants; intervention characteristics (e.g. workshop, reflective practice, seminar, etc.); contexts (e.g. study setting); mechanisms and outcomes; plus any Context-Mechanism-Outcome (CMO) configurations (CMOCs).

A team of reviewers will extract data with a minimum of 10% of the papers being double-checked, with any discrepancies being resolved through discussion (with a different reviewer if necessary).

The researchers will first go through the full text of each selected paper adding e-notes identifying sections of text that may be interpreted as functioning as contexts, mechanisms, outcomes and any CMO configurations for each supervision training intervention. Inspired by other realist syntheses,<sup>49</sup> we aim to answer structured questions as part of this extraction process: (1) interpretation of meaning (e.g. does the relevant text provide sufficient data that could be interpreted as operating as contexts, mechanisms and/or outcomes?); (2) judgements about possible CMOCs (e.g. what is the partial or complete CMOC for the relevant text? Is this CMOC found elsewhere in the same or other documents?); and (3) interpretations about programme theory/theories (e.g. how does this partial or full CMOC interplay with developing programme theory/theories?). This extracted data will then be transferred to the Excel spreadsheet, thus collating CMOCs and CMOCs both within and across the sample of papers.

It is acknowledged that some articles may not fully describe or provide interventional components or contexts sufficiently, thereby not fully answering the research questions. To elicit this relevant but unpublished information, the research team will contact the study authors to request detailed information on certain aspects of interventions, particularly information on contextual factors and mechanisms that have not been reported. Such information will be added to the extraction spreadsheet if made available to authors.

## Synthesise findings and draw conclusions

An Excel spreadsheet will be used to manage the data, the researchers employing realist logic analysis to interpret the data to make inferences about CMOCs and synthesise the findings. Here, we will look for any patterns across the included papers in terms of recurrent CMOCs (so called 'demi-regularities').<sup>41</sup> This team-based analysis process will enable discussion of the data between researchers to allow further examination and the development of initial programme theory/theories. The process of synthesis will include: (1) comparison of findings from different studies; (2) using findings from studies to address the purpose(s) of the synthesis; (3) seeking both confirmatory and contradictory findings; (4) beginning refinement of programme theories in light of evidence; and (5) disseminating the review with findings, conclusions and recommendations.<sup>47</sup> It is worth highlighting here that while we plan to develop initial programme theories through this realist synthesis, we will be primarily testing and modifying these initial programme theories through a subsequent realist evaluation of an Australian supervision training programme for health and human services workers.

## Patient and public involvement

Given that this paper is a protocol for a realist synthesis of supervision training interventions, patients and the public were not involved in the design of the synthesis, nor will they be involved in conducting and disseminating the synthesis.

## Potential limitations of the realist synthesis

We acknowledge several potential limitations of the proposed realist synthesis. First, while we plan to review supervision training literature from both health and human services aligned with our funding, we recognise that these settings are wide-ranging, meaning that our interpretation of context is likely to be challenging. Second, while we will pilot and refine search terms, Boolean

1  
2  
3 operators and proximity searching with the assistance of a medical librarian, we will inevitably omit  
4 terms associated with supervision and/or training, for example, critical companion, meaning that  
5 some important evidence may be missed. Third, while we have decided to include only peer-  
6 reviewed papers due to the vast supervision training literature, we realise that this excludes  
7 potentially important non peer-reviewed grey literature that could facilitate the development of  
8 initial programme theory/theories. Finally, while we have decided to employ rigour checking as part  
9 of our screening/eligibility stages like other researchers,<sup>42 43 45</sup> we know that some realist scholars do  
10 not advocate employing measures of rigour.<sup>54</sup> While our rigour checking will help to reduce the  
11 amount of literature to be synthesised, we will prioritise the realist relevance of papers and how  
12 they can contribute to theory building.  
13  
14  
15  
16  
17  
18  
19  
20  
21  
22  
23  
24  
25

## 26 **Ethics and dissemination**

27  
28  
29  
30 Ethics approval is not required for this study as it pertains to a review of existing evidence. The  
31 findings of this synthesis will be documented using the RAMESES publication standards for realist  
32 syntheses.<sup>48</sup> We expect to disseminate findings via a peer-reviewed journal article, conference  
33 presentation(s) and a report to the Victorian Department of Health and Human Services, Australia as  
34 the project funding body. The findings have the potential to benefit multiple stakeholders involved  
35 in developing, implementing and receiving supervision training, plus can be used to facilitate  
36 continuous quality improvement of supervision training interventions and guide further supervision  
37 training research in the health and human services professions.  
38  
39  
40  
41  
42  
43  
44  
45  
46  
47  
48  
49  
50

51 **Twitter** Follow Sarah Lee at @MissSarahLLee and Charlotte Rees @charlreessidhu

52  
53  
54 **Acknowledgements** The authors would like to thank Anne Young, Medicine, Nursing & Health  
55 Sciences Librarian from the Hargrave-Andrew library, Monash University, for her assistance in the  
56 development of the search strategy and conduct of the searches.  
57  
58  
59  
60

1  
2  
3 **Contributors** Sarah Lee, Charlotte Denniston, Vicki Edouard, Claire Palermo, Kirsty Pope, Keith  
4  
5 Sutton, Susan Waller, Bernadette Ward and Charlotte Rees contributed to the protocol  
6  
7 development. Sarah Lee carried out the initial scoping exercise. While Sarah Lee and Charlotte  
8  
9 Denniston wrote the first draft of the manuscript, Sarah Lee, Claire Palermo and Charlotte Rees  
10  
11 made significant revisions to the manuscript. All iterations of the manuscript were checked by Vicki  
12  
13 Edouard, Kirsty Pope, Keith Sutton, Susan Waller and Bernadette Ward who critically reviewed and  
14  
15 refined the protocol further. All authors approved the final protocol. Sarah Less has been conducting  
16  
17 this synthesis as part of a PhD, with Charlotte Rees and Claire Palermo as her supervisors. Charlotte  
18  
19 Rees is principal investigator of the study.  
20  
21  
22

23  
24 **Funding** This work is being supported by the Victorian Department of Health and Human Services.  
25  
26

27 **Competing interests** None declared.  
28  
29

30 **Ethical approval** This project does not require ethics approval.  
31  
32

33 **Data sharing** Not applicable to this study.  
34  
35

36 **Patient consent** Not applicable to this study.  
37  
38  
39  
40  
41  
42  
43  
44  
45  
46  
47  
48  
49  
50  
51  
52  
53  
54  
55  
56  
57  
58  
59  
60

## References

1. Falender CA, Cornish JAE, Goodyear R, et al. Defining competencies in psychology supervision: A consensus statement. *Journal of Clinical Psychology* 2004;60(7):771-85.
2. Falender CA, Shafranske EP. Clinical supervision: A competency-based approach. Washington, DC: American Psychological Association 2004.
3. Kilminster SM, Jolly BC. Effective supervision in clinical practice settings: a literature review. *Medical Education* 2000;34(10):827-40.
4. Proctor B. Supervision: a co-operative exercise in accountability, enabling and ensuring. *Leicester National Youth Bureau and Council for Education and Training in Youth Work, Leicester* 1986:21-24.
5. Proctor B. Supervision—competence, confidence, accountability. *British Journal of Guidance & Counselling* 1994;22(3):309-18.
6. Brunero S, Stein-Parbury J. The effectiveness of clinical supervision in nursing: an evidenced based literature review. *Australian Journal of Advanced Nursing* 2008;25(3):86-94.
7. Jones A. Clinical supervision: a framework for practice. *International Journal of Psychiatric Nursing Research* 1996;3:290-307.
8. Knudsen HK, Ducharme LJ, Roman PM. Clinical supervision, emotional exhaustion, and turnover intention: A study of substance abuse treatment counselors in the Clinical Trials Network of the National Institute on Drug Abuse. *Journal of Substance Abuse Treatment* 2008;35(4):387-95.
9. Martin P, Copley J, Tyack Z. Twelve tips for effective clinical supervision based on a narrative literature review and expert opinion. *Medical Teacher* 2014;36(3):201-07. doi: 10.3109/0142159X.2013.852166
10. Hall T, Cox D. Clinical supervision: an appropriate term for physiotherapists? *Learning in Health and Social Care* 2009;8(4):282-91.
11. Diane C, Gonzalo A. The experience of therapy supervision within a UK multi-centre randomized controlled trial. *Learning in Health and Social Care* 2009;8(4):301-14.
12. Hunter EP, Blair SE. Staff supervision for occupational therapists. *British Journal of Occupational Therapy* 1999;62(8):344-50.
13. Edwards D, Cooper L, Burnard P, et al. Factors influencing the effectiveness of clinical supervision. *Journal of Psychiatric and Mental Health Nursing* 2005;12(4):405-14.
14. Fowler J. Supporting self and others: from staff nurse to nurse consultant. Part 5: Clinical supervision. *British Journal of Nursing* 2011;20(13):830-30.
15. Jones A. Clinical supervision: what do we know and what do we need to know? A review and commentary. *Journal of Nursing Management* 2006;14(8):577-85.
16. Dilworth S, Higgins I, Parker V, et al. Finding a way forward: A literature review on the current debates around clinical supervision. *Contemporary Nurse* 2013;45(1):22-32.
17. Kleiser H, Cox DL. The integration of clinical and managerial supervision: a critical literature review. *British Journal of Occupational Therapy* 2008;71(1):2-12.
18. Edwards D, Burnard P, Hannigan B, et al. Clinical supervision and burnout: the influence of clinical supervision for community mental health nurses. *Journal of Clinical Nursing* 2006;15(8):1007-15.
19. McLean M, Cilliers F, Van Wyk JM. Faculty development: yesterday, today and tomorrow. *Medical Teacher* 2008;30(6):555-84.
20. Sutkin G, Wagner E, Harris I, et al. What makes a good clinical teacher in medicine? A review of the literature. *Academic Medicine* 2008;83(5):452-66.
21. Jochemsen-van der Leeuw HR, van Dijk N, van Etten-Jamaludin FS, et al. The attributes of the clinical trainer as a role model: a systematic review. *Academic Medicine* 2013;88(1):26-34.



22. Hoffman LW. The Training of Psychotherapy Supervisors. *Psychotherapy in Private Practice* 1994;13(1):23-42.
23. Simpson S, Sparkes C. Are you getting enough? - (2) Supervision Models and Barriers. *Speech and Language Therapy in Practice* 2008:18-19.
24. Strong J, Kavanagh D, Wilson J, et al. Supervision Practice for Allied Health Professionals Within a Large Mental Health Service. *The Clinical Supervisor* 2004;22(1):191-210.
25. Geller E, Foley GM. Broadening the "ports of entry" for speech-language pathologists: A relational and reflective model for clinical supervision. *American Journal of Speech-Language Pathology* 2009;18(1):22-41.
26. Kaufman J, Schwartz T. Models of supervision: Shaping professional identity. *The Clinical Supervisor* 2004;22(1):143-58.
27. Kavanagh DJ, Spence SH, Wilson J, et al. Achieving effective supervision. *Drug & Alcohol Review* 2002;21(3):247-52.
28. Siggins M. Promoting Quality in Clinical Placements: Literature Review and National Stakeholder Consultation. Adelaide, Australia: Health Workforce Australia, 2012.
29. Davys A, Beddoe L. Best practice in professional supervision: A guide for the helping professions. London, UK: Jessica Kingsley Publishers, 2010.
30. Anderson J. Training of supervisors in speech-language pathology and audiology. *American Speech-Language-Hearing Association* 1981;23(2):77-82.
31. Dowling S. Implementing the supervisory process: Theory and practice: Englewood Cliffs, NJ: Prentice-Hall, 1992.
32. American Speech-Language-Hearing Association. Clinical supervision in speech-language pathology. Available at: <https://www.asha.org>, Accessed: July 2008.
33. Milne DL, Sheikh AI, Pattison S, et al. Evidence-Based Training for Clinical Supervisors: A Systematic Review of 11 Controlled Studies. *The Clinical Supervisor* 2011;30(1):53-71.
34. Russell RK, Petrie T. Issues in training effective supervisors. *Applied and Preventive Psychology* 1994;3(1):27-42.
35. Whitman SM, Ryan B, Rubenstein DF. Psychotherapy Supervisor Training. *Academic Psychiatry* 2001;25(3):156-61.
36. McMahan M, Simons R. Supervision Training for Professional Counselors: An Exploratory Study. *Counselor Education and Supervision* 2004;43(4):301-09.
37. Gaitskell S, Morley M. Supervision in Occupational Therapy: How are We Doing? *British Journal of Occupational Therapy* 2008;71(3):119-21.
38. Gonsalvez CJ, Milne DL. Clinical supervisor training in Australia: A review of current problems and possible solutions. *Australian Psychologist* 2010;45(4):233-42.
39. Bernard JM, Goodyear RK. Fundamentals of clinical supervision, 3rd ed. Needham Heights, MA, US: Allyn & Bacon, 2004.
40. Tsutsumi A. Development of an Evidence-based Guideline for Supervisor Training in Promoting Mental Health: Literature Review. *Journal of Occupational Health* 2011;53(1):1-9.
41. Pawson R, Tilley N. An introduction to scientific realist evaluation. Evaluation for the 21st century: A handbook. Thousand Oaks, CA, US: Sage Publications, Inc 1997:405-18.
42. Sholl S, Ajjawi R, Allbutt H, et al. Balancing health care education and patient care in the UK workplace: a realist synthesis. *Medical education* 2017;51(8):787-801.
43. Ajjawi R, Crampton PES, Rees CE. What really matters for successful research environments? A realist synthesis. *Medical Education* 2018 doi: 10.1111/medu.13643
44. Wong G, Westhorp G, Greenhalgh J, et al. Quality and reporting standards, resources, training materials and information for realist evaluation: the RAMESES II project. *Health Services and Delivery Research* 2017;5(28)
45. Kent F, Hayes J, Glass S, et al. Pre-registration interprofessional clinical education in the workplace: a realist review. *Medical education* 2017;51(9):903-17.



- 1  
2  
3 46. Pawson R, Greenhalgh T, Harvey G, et al. Realist review-a new method of systematic review  
4 designed for complex policy interventions. *Journal of Health Services Research & Policy*  
5 2005;10:21-34.  
6  
7 47. Pawson R, Greenhalgh T, Harvey G, et al. Realist synthesis: an introduction. *Manchester: ESRC*  
8 *Research Methods Programme, University of Manchester* 2004  
9 48. Wong G, Greenhalgh T, Westhorp G, et al. RAMESES publication standards: realist syntheses.  
10 *BMC Medicine* 2013;11(1):21.  
11 49. Abrams R, Wong G, Mahtani K, et al. Understanding the impact of delegated home visiting  
12 services accessed via general practice by community-dwelling patients: a realist review  
13 protocol. *BMJ open* 2018;8(11):e024876.  
14 50. Reed DA, Beckman TJ, Wright SM. An assessment of the methodologic quality of medical  
15 education research studies published in The American Journal of Surgery. *The American*  
16 *Journal of Surgery* 2009;198(3):442-44.  
17 51. Cook DA, Reed DA. Appraising the quality of medical education research methods: the medical  
18 education research study quality instrument and the Newcastle–Ottawa Scale-Education.  
19 *Academic Medicine* 2015;90(8):1067-76.  
20 52. Critical Appraisal Skills Programme (CASP) Qualitative Research Checklist Checklist. Available at:  
21 <http://www.casp-uk.net/casp-tools-checklists/> 2018.  
22 53. Brennan N, Bryce M, Pearson M, et al. Understanding how appraisal of doctors produces its  
23 effects: a realist review protocol. *BMJ Open* 2014;4(6):e005466.  
24 54. Wong G. Data gathering in realist reviews. Looking for needles in haystacks. In: Emmel N,  
25 Greenhalgh J, Manzano A, et al., eds. *Doing Realist Research*. London: Sage 2018:131-45.  
26  
27  
28  
29  
30  
31  
32  
33  
34  
35  
36  
37  
38  
39  
40  
41  
42  
43  
44  
45  
46  
47  
48  
49  
50  
51  
52  
53  
54  
55  
56  
57  
58  
59  
60

1  
2  
3  
4  
5  
6  
7  
8  
9  
10  
11  
12  
13  
14  
15  
16  
17  
18  
19  
20  
21  
22  
23  
24  
25  
26  
27  
28  
29  
30  
31  
32  
33  
34  
35  
36  
37  
38  
39  
40  
41  
42  
43  
44  
45  
46  
47  
48  
49  
50  
51  
52  
53  
54  
55  
56  
57  
58  
59  
60

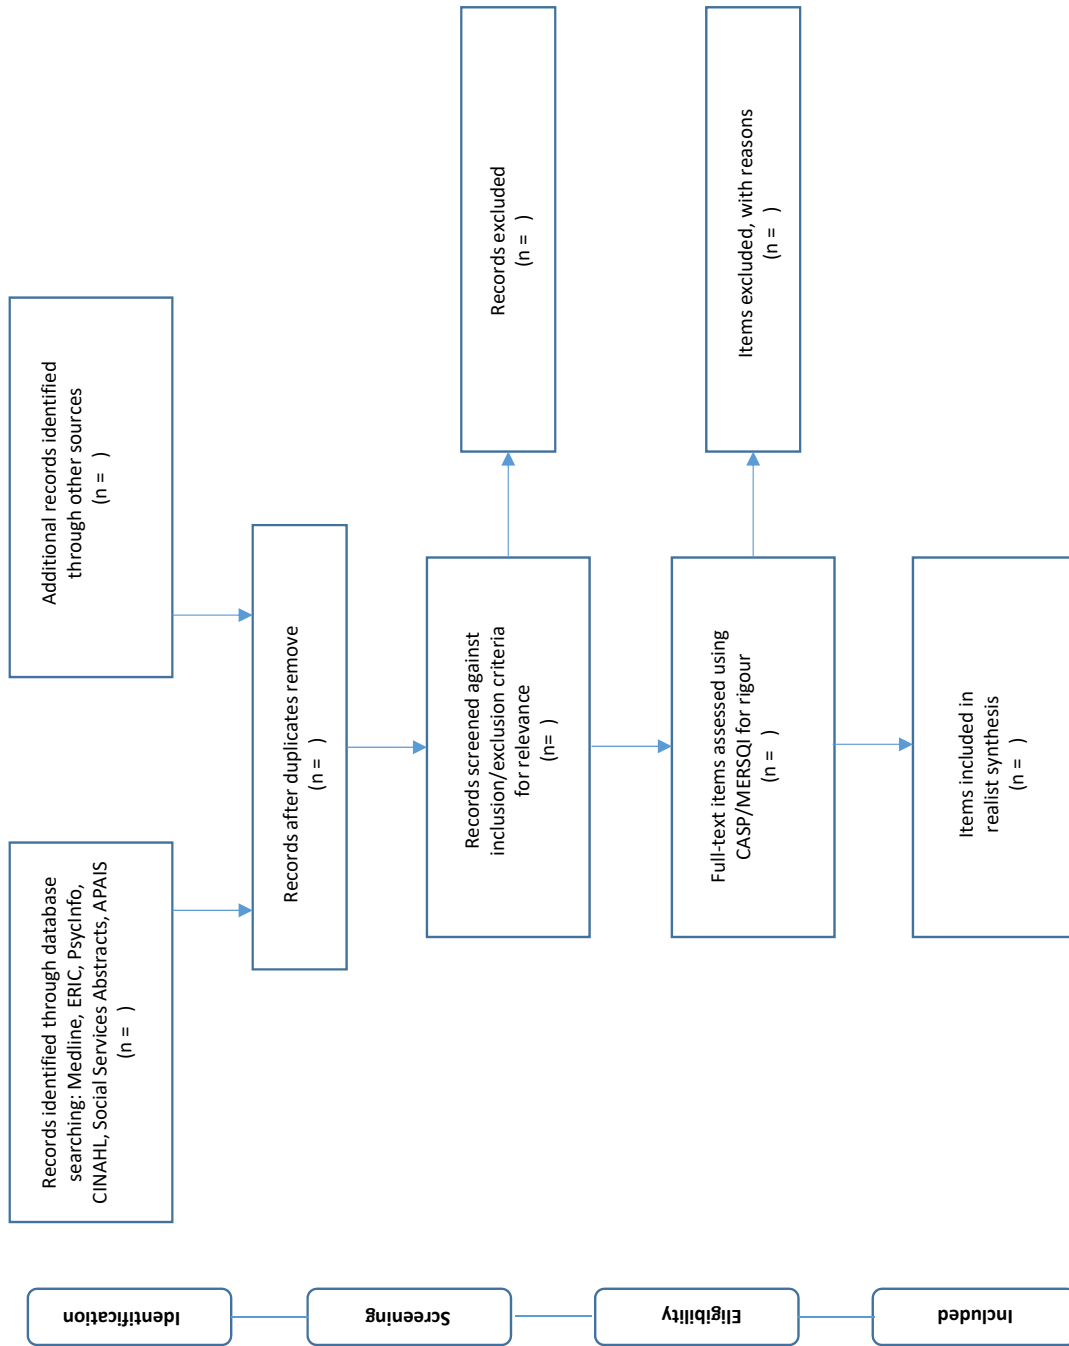

# BMJ Open

## Supervision training interventions in the health and human services: a realist synthesis protocol

|                                 |                                                                                                                                                                                                                                                                                                                                                                                                                                                                                                                                                                                                                                                                                                                                                                                                                                                                                                                                                            |
|---------------------------------|------------------------------------------------------------------------------------------------------------------------------------------------------------------------------------------------------------------------------------------------------------------------------------------------------------------------------------------------------------------------------------------------------------------------------------------------------------------------------------------------------------------------------------------------------------------------------------------------------------------------------------------------------------------------------------------------------------------------------------------------------------------------------------------------------------------------------------------------------------------------------------------------------------------------------------------------------------|
| Journal:                        | <i>BMJ Open</i>                                                                                                                                                                                                                                                                                                                                                                                                                                                                                                                                                                                                                                                                                                                                                                                                                                                                                                                                            |
| Manuscript ID                   | bmjopen-2018-025777.R2                                                                                                                                                                                                                                                                                                                                                                                                                                                                                                                                                                                                                                                                                                                                                                                                                                                                                                                                     |
| Article Type:                   | Protocol                                                                                                                                                                                                                                                                                                                                                                                                                                                                                                                                                                                                                                                                                                                                                                                                                                                                                                                                                   |
| Date Submitted by the Author:   | 14-Mar-2019                                                                                                                                                                                                                                                                                                                                                                                                                                                                                                                                                                                                                                                                                                                                                                                                                                                                                                                                                |
| Complete List of Authors:       | Lee, Sarah; Monash University, Faculty of Medicine, Nursing & Health Sciences, Monash Centre for Scholarship in Health Education (MCSHE) Denniston, Charlotte; Monash University, Monash Centre for Scholarship in Health Education (MCSHE); The University of Melbourne, Melbourne Medical School, Department of Medical Education<br>Edouard, Vicki; Monash University, Faculty of Medicine, Nursing & Health Sciences, Monash Centre for Scholarship in Health Education (MCSHE)<br>Palermo, Claire; Monash University, Faculty of Medicine, Nursing & Health Sciences, Monash Centre for Scholarship in Health Education (MCSHE)<br>Pope, Kirsty; Monash University, Department of Occupational Therapy<br>Sutton, Keith; Monash University, Rural Health<br>Waller, Susan; Monash University, Rural Health<br>Ward, Bernadette; Monash University, Rural Health<br>Rees, Charlotte; Monash University, Faculty of Medicine, Nursing & Health Sciences |
| <b>Primary Subject Heading</b>: | Evidence based practice                                                                                                                                                                                                                                                                                                                                                                                                                                                                                                                                                                                                                                                                                                                                                                                                                                                                                                                                    |
| Secondary Subject Heading:      | Health services research                                                                                                                                                                                                                                                                                                                                                                                                                                                                                                                                                                                                                                                                                                                                                                                                                                                                                                                                   |
| Keywords:                       | Supervision, Realist Synthesis, Education, Training                                                                                                                                                                                                                                                                                                                                                                                                                                                                                                                                                                                                                                                                                                                                                                                                                                                                                                        |
|                                 |                                                                                                                                                                                                                                                                                                                                                                                                                                                                                                                                                                                                                                                                                                                                                                                                                                                                                                                                                            |

SCHOLARONE™  
Manuscripts

1  
2  
3 **Supervision training interventions in the health and human services: a realist synthesis protocol**  
4

5  
6 Sarah Lee,<sup>1</sup> Charlotte Denniston,<sup>1,2,3</sup> Vicki Edouard,<sup>1</sup> Claire Palermo,<sup>1</sup> Kirsty Pope,<sup>4</sup> Keith Sutton,<sup>5</sup>  
7

8 Susan Waller,<sup>5</sup> Bernadette Ward,<sup>6</sup> Charlotte E Rees<sup>1</sup>  
9

10  
11  
12  
13  
14 <sup>1</sup>Monash Centre for Scholarship in Health Education (MCSHE), Monash University, Clayton, Australia  
15

16  
17 <sup>2</sup>Department of Medical Education, Melbourne University, Melbourne, Australia  
18

19  
20 <sup>3</sup>College of Intensive Care Medicine of Australia and New Zealand, Prahran, Australia  
21

22  
23 <sup>4</sup>Department of Occupational Therapy, Monash University, Frankston, Australia  
24

25  
26 <sup>5</sup>Monash Rural Health, Newborough, Monash University, Australia  
27

28  
29 <sup>6</sup>Monash Rural Health, Bendigo, Monash University, Australia  
30

31  
32  
33  
34  
35 **Correspondence to:**  
36

37  
38 Sarah Lee, Monash Centre for Scholarship in Health Education (MCSHE), Monash University, 27  
39

40 Rainforest Walk, Room 321, Clayton Campus, VIC 3800, Australia; Tel: +61 (0)3 9905 1910;  
41

42 Email: sarah.lee1@monash.edu  
43  
44  
45  
46  
47  
48  
49  
50  
51  
52  
53  
54  
55  
56  
57  
58  
59  
60

## ABSTRACT

**Introduction:** Supervision training aims to develop workplace supervisory competencies. Despite extensive supervision literature, including literature reviews, the processes through which supervision training interventions produce their effects, for whom, and under what circumstances is not clearly delineated. The purpose of this study is to explain the effect of contextual factors on the underpinning mechanisms of supervision training outcomes.

**Methods and analysis:** We propose to examine supervision training interventions across the health and human services workforce using realist methods. Pawson's five stages for undertaking a realist synthesis will be followed: (1) clarifying the scope of the review; (2) determining the search strategy; (3) study selection; (4) extracting data; and (5) synthesising the evidence and drawing conclusions. Extracted data will include study characteristics, characteristics of participant cohort, intervention type, contextual factors, underlying mechanisms and supervision training outcomes. Patterns in context-mechanism-outcome configurations will be identified. Initial programme theories will be developed based on a comprehensive search of the literature, which will include key terms relating to supervision and training. The search strategy will involve: (1) electronic database searching using Medline, CINAHL, Social Services Abstracts, ERIC, PsycINFO and APAIS; and (2) hand and citation searching. We will also contact authors where necessary and discuss identified literature amongst the project team with extensive expertise in supervision training.

**Ethics and Dissemination:** The realist synthesis will propose an evidence-informed theory of supervision training interventions (i.e. what interventions work for whom and why). The findings will be disseminated in peer-reviewed journals and presentations and through discussions with relevant organisations and stakeholders. The research will be utilised by educators to develop evidenced-based supervision training interventions. It will also help workplace supervisors to better understand what types of supervision training might work most optimally for them and their colleagues. Other researchers could use the synthesis findings to guide future supervision research.

### Strengths and limitations of this study

- This synthesis will identify how and why components of supervision training are effective (or not) within various settings in the health and human services workforce, rather than merely focusing on whether supervision training is effective.
- A large multidisciplinary research team lends high quality relevance and rigour checks and more comprehensive data interpretation.
- The realist synthesis is well suited to the evaluation of complex interventions such as supervision training.
- Only English language studies will be included, so findings might lack transferability to supervision training interventions in non-English speaking countries.
- Search terms for supervision that are less frequently used in the health and human services (e.g. critical companion, coaching, facilitation, practice development) may be omitted, meaning that some evidence may be missed.

## INTRODUCTION

Supervision is a distinct professional activity characterised by the training and professional development of supervisees,<sup>1,2</sup> and in some literature is understood to be partly hierarchical and evaluative.<sup>3</sup> Although the definition of supervision varies in terms of its purposes, arguably one of the most widely adopted models describing the purpose and functions of supervision is that of Proctor,<sup>4</sup> who outlined three functions of supervision: normative (managerial), formative (educational) and restorative (supportive). The normative function depicts the role that supervision plays as a process for ensuring ethical, acceptable and quality practice.<sup>5</sup> The formative function of supervision encompasses developmental aspects such as gaining knowledge, communication skills, trust in self and confidence.<sup>6</sup> The restorative function focuses on providing support to alleviate burnout and stress.<sup>7</sup> All three functions highlight supervision as a protective factor in professional practice.<sup>8</sup> Note that Proctor's depiction of supervision has been used in this study to help guide our understanding and definition of supervision.

A guideline for what constitutes effective supervision for both the supervisor and supervisee has been outlined in the literature.<sup>9</sup> Effective supervision has been described to include but is not limited to: supervisees choosing their own supervisors,<sup>10</sup> deciding on the most suitable types of supervision (e.g. one-to-one or peer group supervision or a combination of both),<sup>11</sup> establishing a supervision agreement or contract and using a supervision agenda,<sup>12</sup> choosing venues away from supervisees' workplaces to conduct supervision sessions, having an optimal meeting length and frequency (e.g. at least one hour every four weeks),<sup>13</sup> using effective communication and feedback<sup>14</sup>, facilitating reflective practice, use of more than one mode for distance supervision, building a positive supervisory relationship (e.g. one that is positive, supportive, trustworthy, non-judgmental and encouraging),<sup>10,12</sup> separating clinical supervision from line management, undertaking training in supervision and evaluating supervision (either through formal or informal methods).<sup>15</sup>

1  
2  
3 Effective supervision is that which has positive outcomes across all levels of an organisation,<sup>16</sup>  
4 including for the client/patient (e.g. improved client/patient outcomes), and the organisation as a  
5 whole (e.g. improved standards and quality of service delivery).<sup>9 12</sup> Benefits of effective supervision  
6  
7 for practitioners include developing capability and knowledge,<sup>17</sup> reducing burnout,<sup>18</sup> and assisting  
8 practitioners to cope better with their work and workplace.<sup>13</sup> When conducted effectively,  
9  
10 supervision can provide an opportunity for practitioners to reflect on their practice and establish  
11  
12 new approaches to supervision.<sup>9</sup> While effective supervision and its outcomes have been clearly  
13  
14 delineated in the literature,<sup>19-21</sup> the same attention has not been afforded to what constitutes  
15  
16 effective training for supervisors.<sup>2 22</sup>  
17  
18  
19  
20  
21  
22

23  
24 This realist synthesis protocol focuses on supervision practiced in both the broad domains of health  
25  
26 and human services given that it is part of a broader programme of research investigating  
27  
28 supervision training in these wide-ranging settings including: health, housing, children services,  
29  
30 youth and family services, alcohol and drug services and mental health. Although Proctor's model of  
31  
32 supervision has been used to guide our understanding of supervision in the health and human  
33  
34 services, any outcomes of supervision training will be explored in this study including both positive  
35  
36 and negative outcomes at individual, interpersonal and organisation levels. What follows is a brief  
37  
38 outline of: i) the characteristics of supervision within these settings; and ii) the different modes of  
39  
40 supervision training commonly implemented to support supervisors within these settings.  
41  
42  
43  
44

### 45 **Supervision in the health and human services**

46  
47 Literature within health and human services predominately describes supervision as an educative  
48  
49 process. For the most part, the literature embraces the formative and restorative functions of  
50  
51 Proctor's model, thereby characterising supervision as both a platform for practitioners to develop  
52  
53 knowledge, and a method of professional support.<sup>18 23</sup> However, within mental health settings, the  
54  
55 normative function of supervision is typically privileged, with supervision considered as an important  
56  
57 factor in ensuring staff ability and enabling best practice outcomes for consumers and carers.<sup>24</sup>  
58  
59  
60



1  
2  
3 Other allied health professions, such as physiotherapy and speech therapy, report using discipline-  
4 specific supervisory models for a combination of normative, formative *and* restorative functions.<sup>10 25</sup>

5  
6  
7  
8  
9  
10  
11  
12  
13  
14  
15  
16  
17  
18  
19  
20  
21  
22  
23  
24  
25  
26  
27  
28  
29  
30  
31  
32  
33  
34  
35  
36  
37  
38  
39  
40  
41  
42  
43  
44  
45  
46  
47  
48  
49  
50  
51  
52  
53  
54  
55  
56  
57  
58  
59  
60

26

In terms of the human services workforce, in some areas of the workforce like alcohol and other drug services, the empirical evidence for the function of supervision is sparse.<sup>27</sup> Supervision for human services workers appears more complex due to the vast array of diverse settings in which these professionals work. Consequently, there seems to be a multiplicity of definitions, models and applications of supervision within this literature,<sup>28 29</sup> mirroring the broader supervision literature discussed above.

### Supervision training

Supervision training is a common way to support supervisors and prepare them for their supervisory roles within health and human services. Supervision training is typically a process for enhancing supervisor behaviour to improve the outcomes of the supervisory process.<sup>30 31</sup> Current literature suggests that there is a variety of training methods used to support the development of effective supervisors.<sup>32 33</sup> Supervision training can be in the form of formal training (e.g. face-to-face or online workshops and/or seminars), training received informally (e.g. role-modelling and observation), and/or self-directed learning (e.g. guided reading).<sup>33</sup> Supervisors typically receive little or no formal training for their supervision role and little is known about how supervisors acquire knowledge and aptitude in the supervisory role.<sup>33</sup> Supervisor training is rarely empirically or theoretically grounded,<sup>3</sup> and it appears that most professionals learn supervisor skills by assimilating their own experiences as supervisees or through informal methods (e.g. observation). The process of learning to be a supervisor therefore often occurs by default.<sup>34</sup>

Inadequate attention to supervision outcomes, supervision training and supervision research, however, has started to raise concerns about the quality of supervision delivered across a number of different disciplines.<sup>35 27 36 37</sup> The assumption that experience as a practitioner or a supervisee

1  
2  
3 translates into becoming an effective supervisor is, of course, erroneous.<sup>38</sup> Indeed, there is a  
4  
5 distinction between practitioner skills and supervisor skills,<sup>33</sup> and specific training to develop  
6  
7 supervisory skills is crucial.  
8  
9

10  
11 While there is broad understanding about what constitutes effective supervision,<sup>19-21</sup> little attention  
12  
13 has been paid to what constitutes effective *training* of supervisors.<sup>2 22</sup> Therefore, insufficient clarity  
14  
15 still exists regarding how supervisors should be trained to become effective supervisors.<sup>33</sup> It has  
16  
17 been said that: 'research on the effectiveness of supervision training remains virtually non-  
18  
19 existent'.<sup>39, p219</sup>  
20  
21

22  
23 Three reviews (two systematic, one narrative) regarding supervision training have been published  
24  
25 since 2004,<sup>33 38 40</sup> and these provide a useful starting point to understand supervision training.  
26

27 Firstly, Gonsalvez and Milne<sup>38</sup> conducted a narrative review of clinical supervision training changes in  
28  
29 professional psychology within Australia, both examining and addressing solutions to emerging  
30  
31 problems. Gonsalvez and Milne identified a need for better regulation of supervisory practice within  
32  
33 psychology and recommended that supervisory practice be supported with enhanced development  
34  
35 of resources (e.g. manuals, workbooks and better psychometric tools to evaluate supervisory  
36  
37 processes). Secondly, Milne et al.<sup>33</sup> conducted a systematic review of controlled trials of supervision  
38  
39 interventions and found clear empirical support for supervisor training; training which when  
40  
41 effective could help to bridge the gap between policy and practice, and ensure that therapies within  
42  
43 the mental health field are implemented with fidelity. This review also helps us to understand the  
44  
45 complexity and diversity of supervisor training. For example, they found 56 supervisor-training  
46  
47 methods were used across the 11 studies reviewed. Training methods included: workshops, role-  
48  
49 play, modelling, guided reading, direct observation and/or teaching (through verbal instruction).  
50  
51  
52 Finally, Tsutsumi's<sup>40</sup> systematic review, including 7 controlled studies assessing the effect of  
53  
54 supervisor training on the mental health of subordinate workers, proposed an evidenced-based  
55  
56 guideline for supervisor training, which included: what training content should include, the aim (e.g.  
57  
58  
59  
60

1  
2  
3 behaviour modification among supervisors), frequency of training (i.e. yearly) and the target  
4  
5 population for training (e.g. all supervisors). The guideline aimed to improve the mental health of  
6  
7 workers by ensuring that all supervisors were trained and would therefore be better equipped to  
8  
9 support the mental health of their workers.  
10

11  
12 While these reviews have made a helpful start in illustrating what effective supervision training can  
13  
14 look like, they have their limitations. For example, these reviews do not include recently published  
15  
16 papers (i.e. papers published from 2010 onwards), they only include a small number of papers (i.e.  
17  
18 two systematic reviews with 7 and 11 controlled studies respectively,<sup>40 33</sup> and one narrative review  
19  
20 which did not clearly indicate the number of papers reviewed).<sup>38</sup> Additionally, these previous  
21  
22 reviews tend to focus either on the mental health setting only or on supervisory support for workers'  
23  
24 mental health, thereby failing to explore supervision training across a diverse range of health and  
25  
26 human services professions. Furthermore, none of these reviews explore the extent to which  
27  
28 supervision training interventions produce their effects, how, for whom and under what contexts.  
29  
30 Therefore, the synthesis described in this protocol aims to address this gap in knowledge. Utilising a  
31  
32 realist approach, this study will allow interpretability of findings across different contexts and will  
33  
34 address the question of what supervision training interventions work, for whom, under what  
35  
36 circumstances, how and why.  
37  
38  
39  
40

### 41 42 **Realist synthesis methodology**

43  
44 Traditional methodological approaches to evaluating interventions, such as randomised controlled  
45  
46 trials (RCTs), are orientated towards conceptually simple questions of causality such as: 'is this  
47  
48 intervention effective or not?' Such a question of causality tends to be better suited to clinical  
49  
50 treatments rather than complex health and education interventions such as supervision training.  
51  
52 Realist methodology, therefore, is being used increasingly to study the workings of complex health  
53  
54 and education interventions.<sup>41-46</sup> Realist approaches privilege context in the evaluation of  
55  
56 interventions. For example, a realist approach acknowledges that an intervention that works well  
57  
58  
59  
60

1  
2  
3 within any given healthcare service (e.g. supervision training for doctors), may not work well within a  
4  
5 human service setting in the community (e.g. supervision training for housing or child protection  
6  
7 professionals). Therefore, understanding contextual variation and how this impacts the effectiveness  
8  
9 (or otherwise) of an intervention is crucial to the development and implementation of complex  
10  
11 interventions. This review will be underpinned by scientific realism, which is a logic of inquiry that  
12  
13 generates distinct research strategies and utilises research methods and techniques within these to  
14  
15 ascertain an in-depth understanding of causality.<sup>47</sup> Such realism will help us to unpack and  
16  
17 synthesise hidden mechanisms at play within primary studies, thus allowing us to gain deeper  
18  
19 understandings about how supervisor training as a complex programme works or fails to work, and  
20  
21 why in our chosen different settings.<sup>38</sup>  
22  
23  
24  
25

## 26 **Study aim and research questions**

27  
28 This study aims to address the ways in which supervision training interventions impact and influence  
29  
30 supervisory practice, for whom and under what circumstances, how and why. The research  
31  
32 questions for this realist synthesis protocol are as follows:  
33  
34

- 35  
36 1) In what ways do supervision training interventions enable or inhibit successful supervision,  
37  
38 for whom and in what contexts?
- 39  
40 2) What are the key mechanisms that influence supervision training outcomes?  
41  
42  
43

## 44 **METHODS AND ANALYSIS**

45  
46 The protocol for this review is registered with the International Prospective Register for Systematic  
47  
48 Reviews (PROSPERO: registration number CRD42018094186).  
49  
50

### 51 **Study design**

52  
53 This study will be guided by Pawson's<sup>46</sup> five stages for conducting a realist review: (1) clarifying the  
54  
55 scope of the review; (2) determining the search strategy; (3) study selection; (4) extracting data; and  
56  
57 (5) synthesising the evidence and drawing conclusions. Although presented in a linear way here, the  
58  
59  
60

1  
2  
3 review process is iterative in nature and therefore may not follow this process precisely. The findings  
4  
5 of this synthesis will be written up according to the RAMESES publication standards for realist  
6  
7 syntheses.<sup>48</sup>  
8  
9

### 10 Clarifying scope of the synthesis/Identify existing theories

11  
12 The first stage of our realist synthesis will be to: (a) refine the purpose of the synthesis; and (b)  
13  
14 identify any key theories to be explored. The research team, with the help of a medical librarian, will  
15  
16 refine the purpose and identify any key theories through first scoping the current supervision  
17  
18 training literature. This will involve creating a matrix identifying existing primary literature, literature  
19  
20 reviews, search terms and their synonyms. The lead author will work with the medical librarian to  
21  
22 run pilot searches through several databases to test search terms, Boolean operators and proximity  
23  
24 searching. These pilot searches will be used to help refine the research questions based on any gaps  
25  
26 in knowledge in the empirical literature. This scoping exercise will help in starting to identify the  
27  
28 circumstances for supervision training use and the nature of supervision training in the health and  
29  
30 human services workforces. While this scoping exercise may start to identify initial programme  
31  
32 theories about how and why interventions work (or fail to work) and in what contexts, we anticipate  
33  
34 developing programme theories through later stages of our realist synthesis (for example, see  
35  
36 'extraction' later).  
37  
38  
39  
40  
41  
42

### 43 Search strategy

44  
45  
46 A comprehensive search of the literature will be conducted in MEDLINE (Ovid), Cumulative Index to  
47  
48 Nursing and Allied Health Literature (CINAHL Plus, Ebsco), Scopus, PsycINFO (Ovid), Australian Public  
49  
50 Affairs Information Service (APAIS, Informit), Social Services Abstracts (ProQuest) and Educational  
51  
52 Resources Information Center (ERIC, ProQuest) by the lead author, with input from a medical  
53  
54 librarian and co-authors. We do not plan to limit our searches by date. Citations and reference lists  
55  
56 of included studies will be checked to identify additional relevant studies.  
57  
58  
59  
60

An extensive range of search terms relating to 'supervisors' or 'supervision' and 'training' (see Table 1) will be tested and combined with proximity searching, Boolean operators, truncations and asterisks. An example of a Medline (Ovid) search strategy is included in Box 1.

**Table 1 Search terms to be used for the databases**

| Supervisor Terms                  | Training Terms                  |
|-----------------------------------|---------------------------------|
| <i>Supervisor*, Supervision</i>   | <i>Education</i>                |
| <i>Practice educator*</i>         | <i>Professional development</i> |
| <i>Clinical educator*</i>         | <i>Educating</i>                |
| <i>Mentor, Mentoring, Mentors</i> | <i>Faculty development</i>      |
| <i>Trainer*</i>                   | <i>"Train the trainer"</i>      |
| <i>Fieldwork educator*</i>        | <i>Personal development</i>     |
| <i>Instructor</i>                 | <i>CPD</i>                      |
| <i>Preceptor, preceptors</i>      | <i>Workshop</i>                 |
| <i>Placement educator</i>         |                                 |
| <i>Clinical teacher*</i>          |                                 |

*Asterisk (\*) is used to search for both plural and non-plural, for example, trainer\* would search for both trainer and trainers.*

Searches will be adapted to account for the different functions of each database (see Box 1 for an illustrative Medline search).

**Box 1 An illustrative Medline search**

(supervisor\* OR mentors OR mentor OR mentoring OR instructor\* OR placement educator\* OR practice educator\* OR trainer\* OR preceptor OR preceptors OR clinical teacher\* OR clinical educator\* or fieldwork educator\*) ADJ3 (training OR education OR educating OR workshop\*)  
 OR  
 Supervision ADJ (training OR education OR educating OR workshop\*)  
 OR  
 "train the trainer\*"

1  
2  
3  
4  
5  
6  
7  
8  
9  
10  
11  
12  
13  
14  
15  
16  
17  
18  
19  
20  
21  
22  
23  
24  
25  
26  
27  
28  
29  
30  
31  
32  
33  
34  
35  
36  
37  
38  
39  
40  
41  
42  
43  
44  
45  
46  
47  
48  
49  
50  
51  
52  
53  
54  
55  
56  
57  
58  
59  
60

OR

(professional development OR faculty development OR personal development OR CPD) ADJ3  
(supervisor\* OR mentors OR mentor OR mentoring OR instructor\* OR placement educator\* OR  
practice educator\* OR trainer\* OR preceptor OR preceptors OR clinical teacher\* OR clinical  
educator\* OR fieldwork educator\*)

## Study selection

Initial assessment of relevance will be carried out by multiple researchers. Titles and/or abstracts of studies retrieved using the search strategy, and those from additional sources against preliminary inclusion criteria, will be reviewed using the platform Covidence.

The inclusion criteria for studies are as follows: (1) directly relate to one or more of the research questions; (2) relate to the following populations: health, housing, children services, youth and families services, alcohol and drug services and mental health disciplines within the health and human services workforces; (3) directly relate to supervision training interventions (4); literature must be written in the English language; and (5) be primary research and peer-reviewed articles only. Note that while we decided to include only peer-reviewed articles in our synthesis rather than grey literature (due to the vast literature on supervision training), we intend to employ grey literature to make sense of our synthesis findings, plus we intend to use grey literature for a subsequent realist evaluation of a supervision training programme. The key exclusion criterion is literature relating to *research* supervision training interventions.

The relevance of an article will not only be judged against the synthesis questions but will also be judged in terms of whether papers can contribute to theory building.<sup>48,49</sup> A second independent researcher will check any ambiguities at this stage (i.e. articles selected as 'maybe' in Covidence).

After relevance checks, the full text of the remaining articles will then be retrieved and independently assessed for rigour (researchers will ask, 'are the methods used to generate data credible and trustworthy?').<sup>49</sup> Multiple researchers will check rigour using either the Medical

1  
2  
3 Education Research Study Quality Instrument (MERSQI)<sup>50 51</sup> (for quantitative studies) or the Critical  
4 Appraisal Skills Programme (CASP) qualitative checklist<sup>52</sup> (for qualitative or mixed methods studies).  
5  
6 Any disagreements over eligibility based on quality will be resolved through discussion between the  
7  
8 researchers, and if this is not possible, an extra reviewer will be brought in to adjudicate. Double-  
9  
10 checking will be carried out and discussed for approximately 5% of included and excluded papers at  
11  
12 the relevance stage and 10% of the included and excluded papers at the rigour stage for quality  
13  
14 control purposes.<sup>53</sup> The assessment of eligibility for inclusion will be an iterative process as the  
15  
16 synthesis progresses and new or refined elements of theory may be required to explain different  
17  
18 aspects of the developing theory/theories. Figure 1 outlines the Preferred Reporting Items for  
19  
20 Systematic Reviews and Meta-analysis (PRISMA) process for study selection. The PRISMA diagram  
21  
22 will be employed to allow for a clear articulation of the systematic process for this literature review.  
23  
24  
25  
26  
27  
28  
29  
30

### 31 **Figure 1 PRISMA diagram for realist synthesis of supervision training interventions**

#### 32 33 34 Extracting data

35  
36 An Excel spreadsheet will be used to document the extracted data from included studies. Given that  
37  
38 this study is following a realist synthesis method, the extracted data will include: study  
39  
40 characteristics (e.g. publication year, study methodology, etc.); types of participants; intervention  
41  
42 characteristics (e.g. workshop, reflective practice, seminar, etc.); contexts (e.g. study setting);  
43  
44 mechanisms and outcomes; plus any Context-Mechanism-Outcome (CMO) configurations (CMOCs).  
45  
46

47 A team of reviewers will extract data with a minimum of 10% of the papers being double-checked,  
48  
49 with any discrepancies being resolved through discussion (with a different reviewer if necessary).  
50  
51

52 The researchers will first go through the full text of each selected paper adding e-notes identifying  
53  
54 sections of text that may be interpreted as functioning as contexts, mechanisms, outcomes and any  
55  
56 CMO configurations for each supervision training intervention. Inspired by other realist syntheses,<sup>49</sup>  
57  
58 we aim to answer structured questions as part of this extraction process: (1) interpretation of  
59  
60



1  
2  
3 meaning (e.g. does the relevant text provide sufficient data that could be interpreted as operating as  
4 contexts, mechanisms and/or outcomes?); (2) judgements about possible CMOCs (e.g. what is the  
5 partial or complete CMOC for the relevant text? Is this CMOC found elsewhere in the same or other  
6 documents?); and (3) interpretations about programme theory/theories (e.g. how does this partial  
7 or full CMOC interplay with developing programme theory/theories?). This extracted data will then  
8 be transferred to the Excel spreadsheet, thus collating CMOs and CMOCs both within and across the  
9 sample of papers.  
10  
11  
12  
13  
14  
15  
16  
17

18  
19 It is acknowledged that some articles may not fully describe or provide interventional components  
20 or contexts sufficiently, thereby not fully answering the research questions. To elicit this relevant but  
21 unpublished information, the research team will contact the study authors to request detailed  
22 information on certain aspects of interventions, particularly information on contextual factors and  
23 mechanisms that have not been reported. Such information will be added to the extraction  
24 spreadsheet if made available to authors.  
25  
26  
27  
28  
29  
30  
31  
32

### 33 Synthesise findings and draw conclusions

34  
35 An Excel spreadsheet will be used to manage the data, the researchers employing realist logic  
36 analysis to interpret the data to make inferences about CMOCs and synthesise the findings. Here,  
37 we will look for any patterns across the included papers in terms of recurrent CMOCs (so called  
38 'demi-regularities').<sup>41</sup> This team-based analysis process will enable discussion of the data between  
39 researchers to allow further examination and the development of initial programme  
40 theory/theories. The process of synthesis will include: (1) comparison of findings from different  
41 studies; (2) using findings from studies to address the purpose(s) of the synthesis; (3) seeking both  
42 confirmatory and contradictory findings; (4) beginning refinement of programme theories in light of  
43 evidence; and (5) disseminating the review with findings, conclusions and recommendations.<sup>47</sup> It is  
44 worth highlighting here that while we plan to develop initial programme theories through this realist  
45 synthesis, we will be primarily testing and modifying these initial programme theories through a  
46  
47  
48  
49  
50  
51  
52  
53  
54  
55  
56  
57  
58  
59  
60

1  
2  
3 subsequent realist evaluation of an Australian supervision training programme for health and human  
4  
5 services workers.  
6  
7

## 8 Patient and public involvement

9  
10 Given that this paper is a protocol for a realist synthesis of supervision training interventions,  
11  
12 patients and the public were not involved in the design of the synthesis, nor will they be involved in  
13  
14 conducting and disseminating the synthesis.  
15  
16

## 17 18 19 20 21 **Potential limitations of the realist synthesis**

22  
23 We acknowledge several potential limitations of the proposed realist synthesis. First, while we plan  
24  
25 to review supervision training literature from both health and human services aligned with our  
26  
27 funding, we recognise that these settings are wide-ranging, meaning that our interpretation of  
28  
29 context is likely to be challenging. Second, while we will pilot and refine search terms, Boolean  
30  
31 operators and proximity searching with the assistance of a medical librarian, we will inevitably omit  
32  
33 terms associated with supervision and/or training, for example, critical companion, coaching,  
34  
35 facilitation and practice development, meaning that some important evidence may be missed.  
36  
37 Third, while we have decided to include only peer-reviewed papers due to the vast supervision  
38  
39 training literature, we realise that this excludes potentially important non peer-reviewed grey  
40  
41 literature that could facilitate the development of initial programme theory/theories. Finally, while  
42  
43 we have decided to employ rigour checking as part of our screening/eligibility stages like other  
44  
45 researchers,<sup>42 43 45</sup> we know that some realist scholars do not advocate employing measures of  
46  
47 rigour.<sup>54</sup> While our rigour checking will help to reduce the amount of literature to be synthesised,  
48  
49 we will prioritise the realist relevance of papers and how they can contribute to theory building.  
50  
51  
52  
53

## 54 55 **Ethics and dissemination**

56  
57  
58 Ethics approval is not required for this study as it pertains to a review of existing evidence. The  
59  
60 findings of this synthesis will be documented using the RAMESES publication standards for realist

1  
2  
3 syntheses.<sup>48</sup> We expect to disseminate findings via a peer-reviewed journal article, conference  
4 presentation(s) and a report to the Victorian Department of Health and Human Services, Australia as  
5 the project funding body. The findings have the potential to benefit multiple stakeholders involved  
6 in developing, implementing and receiving supervision training, plus can be used to facilitate  
7 continuous quality improvement of supervision training interventions and guide further supervision  
8 training research in the health and human services professions.  
9  
10  
11  
12  
13  
14  
15  
16  
17  
18  
19

20 **Twitter** Follow Sarah Lee at @MissSarahLLee and Charlotte Rees @charlreessidhu  
21  
22

23 **Acknowledgements** The authors would like to thank Anne Young, Medicine, Nursing & Health  
24 Sciences Librarian from the Hargrave-Andrew library, Monash University, for her assistance in the  
25 development of the search strategy and conduct of the searches.  
26  
27  
28  
29

30 **Contributors** Sarah Lee, Charlotte Denniston, Vicki Edouard, Claire Palermo, Kirsty Pope, Keith  
31 Sutton, Susan Waller, Bernadette Ward and Charlotte Rees contributed to the protocol  
32 development. Sarah Lee carried out the initial scoping exercise. While Sarah Lee and Charlotte  
33 Denniston wrote the first draft of the manuscript, Sarah Lee, Claire Palermo and Charlotte Rees  
34 made significant revisions to the manuscript. All iterations of the manuscript were checked by Vicki  
35 Edouard, Kirsty Pope, Keith Sutton, Susan Waller and Bernadette Ward who critically reviewed and  
36 refined the protocol further. All authors approved the final protocol. Sarah Less has been conducting  
37 this synthesis as part of a PhD, with Charlotte Rees and Claire Palermo as her supervisors. Charlotte  
38 Rees is principal investigator of the study.  
39  
40  
41  
42  
43  
44  
45  
46  
47  
48  
49

50  
51 **Funding** This work is being supported by the Victorian Department of Health and Human Services.  
52  
53

54 **Competing interests** None declared.  
55  
56

57 **Ethical approval** This project does not require ethics approval.  
58  
59

60 **Data sharing** Not applicable to this study.

1  
2  
3  
4  
5  
6  
7  
8  
9  
10  
11  
12  
13  
14  
15  
16  
17  
18  
19  
20  
21  
22  
23  
24  
25  
26  
27  
28  
29  
30  
31  
32  
33  
34  
35  
36  
37  
38  
39  
40  
41  
42  
43  
44  
45  
46  
47  
48  
49  
50  
51  
52  
53  
54  
55  
56  
57  
58  
59  
60

**Patient consent** Not applicable to this study.

For peer review only

## References

1. Falender CA, Cornish JAE, Goodyear R, et al. Defining competencies in psychology supervision: A consensus statement. *Journal of Clinical Psychology* 2004;60(7):771-85.
2. Falender CA, Shafranske EP. Clinical supervision: A competency-based approach. Washington, DC: American Psychological Association 2004.
3. Kilminster SM, Jolly BC. Effective supervision in clinical practice settings: a literature review. *Medical Education* 2000;34(10):827-40.
4. Proctor B. Supervision: a co-operative exercise in accountability, enabling and ensuring. *Leicester National Youth Bureau and Council for Education and Training in Youth Work, Leicester* 1986:21-24.
5. Proctor B. Supervision—competence, confidence, accountability. *British Journal of Guidance & Counselling* 1994;22(3):309-18.
6. Brunero S, Stein-Parbury J. The effectiveness of clinical supervision in nursing: an evidenced based literature review. *Australian Journal of Advanced Nursing* 2008;25(3):86-94.
7. Jones A. Clinical supervision: a framework for practice. *International Journal of Psychiatric Nursing Research* 1996;3:290-307.
8. Knudsen HK, Ducharme LJ, Roman PM. Clinical supervision, emotional exhaustion, and turnover intention: A study of substance abuse treatment counselors in the Clinical Trials Network of the National Institute on Drug Abuse. *Journal of Substance Abuse Treatment* 2008;35(4):387-95.
9. Martin P, Copley J, Tyack Z. Twelve tips for effective clinical supervision based on a narrative literature review and expert opinion. *Medical Teacher* 2014;36(3):201-07. doi: 10.3109/0142159X.2013.852166
10. Hall T, Cox D. Clinical supervision: an appropriate term for physiotherapists? *Learning in Health and Social Care* 2009;8(4):282-91.
11. Diane C, Gonzalo A. The experience of therapy supervision within a UK multi-centre randomized controlled trial. *Learning in Health and Social Care* 2009;8(4):301-14.
12. Hunter EP, Blair SE. Staff supervision for occupational therapists. *British Journal of Occupational Therapy* 1999;62(8):344-50.
13. Edwards D, Cooper L, Burnard P, et al. Factors influencing the effectiveness of clinical supervision. *Journal of Psychiatric and Mental Health Nursing* 2005;12(4):405-14.
14. Fowler J. Supporting self and others: from staff nurse to nurse consultant. Part 5: Clinical supervision. *British Journal of Nursing* 2011;20(13):830-30.
15. Jones A. Clinical supervision: what do we know and what do we need to know? A review and commentary. *Journal of Nursing Management* 2006;14(8):577-85.
16. Dilworth S, Higgins I, Parker V, et al. Finding a way forward: A literature review on the current debates around clinical supervision. *Contemporary Nurse* 2013;45(1):22-32.
17. Kleiser H, Cox DL. The integration of clinical and managerial supervision: a critical literature review. *British Journal of Occupational Therapy* 2008;71(1):2-12.
18. Edwards D, Burnard P, Hannigan B, et al. Clinical supervision and burnout: the influence of clinical supervision for community mental health nurses. *Journal of Clinical Nursing* 2006;15(8):1007-15.
19. McLean M, Cilliers F, Van Wyk JM. Faculty development: yesterday, today and tomorrow. *Medical Teacher* 2008;30(6):555-84.
20. Sutkin G, Wagner E, Harris I, et al. What makes a good clinical teacher in medicine? A review of the literature. *Academic Medicine* 2008;83(5):452-66.
21. Jochemsen-van der Leeuw HR, van Dijk N, van Etten-Jamaludin FS, et al. The attributes of the clinical trainer as a role model: a systematic review. *Academic Medicine* 2013;88(1):26-34.
22. Hoffman LW. The Training of Psychotherapy Supervisors. *Psychotherapy in Private Practice* 1994;13(1):23-42.

23. Simpson S, Sparkes C. Are you getting enough? - (2) Supervision Models and Barriers. *Speech and Language Therapy in Practice* 2008;18-19.
24. Strong J, Kavanagh D, Wilson J, et al. Supervision Practice for Allied Health Professionals Within a Large Mental Health Service. *The Clinical Supervisor* 2004;22(1):191-210.
25. Geller E, Foley GM. Broadening the "ports of entry" for speech-language pathologists: A relational and reflective model for clinical supervision. *American Journal of Speech-Language Pathology* 2009;18(1):22-41.
26. Kaufman J, Schwartz T. Models of supervision: Shaping professional identity. *The Clinical Supervisor* 2004;22(1):143-58.
27. Kavanagh DJ, Spence SH, Wilson J, et al. Achieving effective supervision. *Drug & Alcohol Review* 2002;21(3):247-52.
28. Siggins M. Promoting Quality in Clinical Placements: Literature Review and National Stakeholder Consultation. Adelaide, Australia: Health Workforce Australia, 2012.
29. Davys A, Beddoe L. Best practice in professional supervision: A guide for the helping professions. London, UK: Jessica Kingsley Publishers, 2010.
30. Anderson J. Training of supervisors in speech-language pathology and audiology. *American Speech-Language-Hearing Association* 1981;23(2):77-82.
31. Dowling S. Implementing the supervisory process: Theory and practice: Englewood Cliffs, NJ: Prentice-Hall, 1992.
32. American Speech-Language-Hearing Association. Clinical supervision in speech-language pathology. Available at: <https://www.asha.org>, Accessed: July 2008.
33. Milne DL, Sheikh AI, Pattison S, et al. Evidence-Based Training for Clinical Supervisors: A Systematic Review of 11 Controlled Studies. *The Clinical Supervisor* 2011;30(1):53-71.
34. Russell RK, Petrie T. Issues in training effective supervisors. *Applied and Preventive Psychology* 1994;3(1):27-42.
35. Whitman SM, Ryan B, Rubenstein DF. Psychotherapy Supervisor Training. *Academic Psychiatry* 2001;25(3):156-61.
36. McMahon M, Simons R. Supervision Training for Professional Counselors: An Exploratory Study. *Counselor Education and Supervision* 2004;43(4):301-09.
37. Gaitskell S, Morley M. Supervision in Occupational Therapy: How are We Doing? *British Journal of Occupational Therapy* 2008;71(3):119-21.
38. Gonsalvez CJ, Milne DL. Clinical supervisor training in Australia: A review of current problems and possible solutions. *Australian Psychologist* 2010;45(4):233-42.
39. Bernard JM, Goodyear RK. Fundamentals of clinical supervision, 3rd ed. Needham Heights, MA, US: Allyn & Bacon, 2004.
40. Tsutsumi A. Development of an Evidence-based Guideline for Supervisor Training in Promoting Mental Health: Literature Review. *Journal of Occupational Health* 2011;53(1):1-9.
41. Pawson R, Tilley N. An introduction to scientific realist evaluation. Evaluation for the 21st century: A handbook. Thousand Oaks, CA, US: Sage Publications, Inc 1997:405-18.
42. Sholl S, Ajjawi R, Allbutt H, et al. Balancing health care education and patient care in the UK workplace: a realist synthesis. *Medical education* 2017;51(8):787-801.
43. Ajjawi R, Crampton PES, Rees CE. What really matters for succesful research environments? A realist synthesis. *Medical Education* 2018 doi: 10.1111/medu.13643
44. Wong G, Westhorp G, Greenhalgh J, et al. Quality and reporting standards, resources, training materials and information for realist evaluation: the RAMESES II project. *Health Services and Delivery Research* 2017;5(28)
45. Kent F, Hayes J, Glass S, et al. Pre-registration interprofessional clinical education in the workplace: a realist review. *Medical education* 2017;51(9):903-17.
46. Pawson R, Greenhalgh T, Harvey G, et al. Realist review-a new method of systematic review designed for complex policy interventions. *Journal of Health Services Research & Policy* 2005;10:21-34.

- 1  
2  
3 47. Pawson R, Greenhalgh T, Harvey G, et al. Realist synthesis: an introduction. *Manchester: ESRC*  
4 *Research Methods Programme, University of Manchester* 2004  
5  
6 48. Wong G, Greenhalgh T, Westhorp G, et al. RAMESES publication standards: realist syntheses.  
7 *BMC Medicine* 2013;11(1):21.  
8  
9 49. Abrams R, Wong G, Mahtani K, et al. Understanding the impact of delegated home visiting  
10 services accessed via general practice by community-dwelling patients: a realist review  
11 protocol. *BMJ open* 2018;8(11):e024876.  
12  
13 50. Reed DA, Beckman TJ, Wright SM. An assessment of the methodologic quality of medical  
14 education research studies published in *The American Journal of Surgery*. *The American*  
15 *Journal of Surgery* 2009;198(3):442-44.  
16  
17 51. Cook DA, Reed DA. Appraising the quality of medical education research methods: the medical  
18 education research study quality instrument and the Newcastle–Ottawa Scale-Education.  
19 *Academic Medicine* 2015;90(8):1067-76.  
20  
21 52. Critical Appraisal Skills Programme (CASP) Qualitative Research Checklist Checklist. Available at:  
22 <http://www.casp-uk.net/casp-tools-checklists/> 2018.  
23  
24 53. Brennan N, Bryce M, Pearson M, et al. Understanding how appraisal of doctors produces its  
25 effects: a realist review protocol. *BMJ Open* 2014;4(6):e005466.  
26  
27 54. Wong G. Data gathering in realist reviews. Looking for needles in haystacks. In: Emmel N,  
28 Greenhalgh J, Manzano A, et al., eds. *Doing Realist Research*. London: Sage 2018:131-45.  
29  
30  
31  
32  
33  
34  
35  
36  
37  
38  
39  
40  
41  
42  
43  
44  
45  
46  
47  
48  
49  
50  
51  
52  
53  
54  
55  
56  
57  
58  
59  
60

1  
2  
3  
4  
5  
6  
7  
8  
9  
10  
11  
12  
13  
14  
15  
16  
17  
18  
19  
20  
21  
22  
23  
24  
25  
26  
27  
28  
29  
30  
31  
32  
33  
34  
35  
36  
37  
38  
39  
40  
41  
42  
43  
44  
45  
46  
47  
48  
49  
50  
51  
52  
53  
54  
55  
56  
57  
58  
59  
60

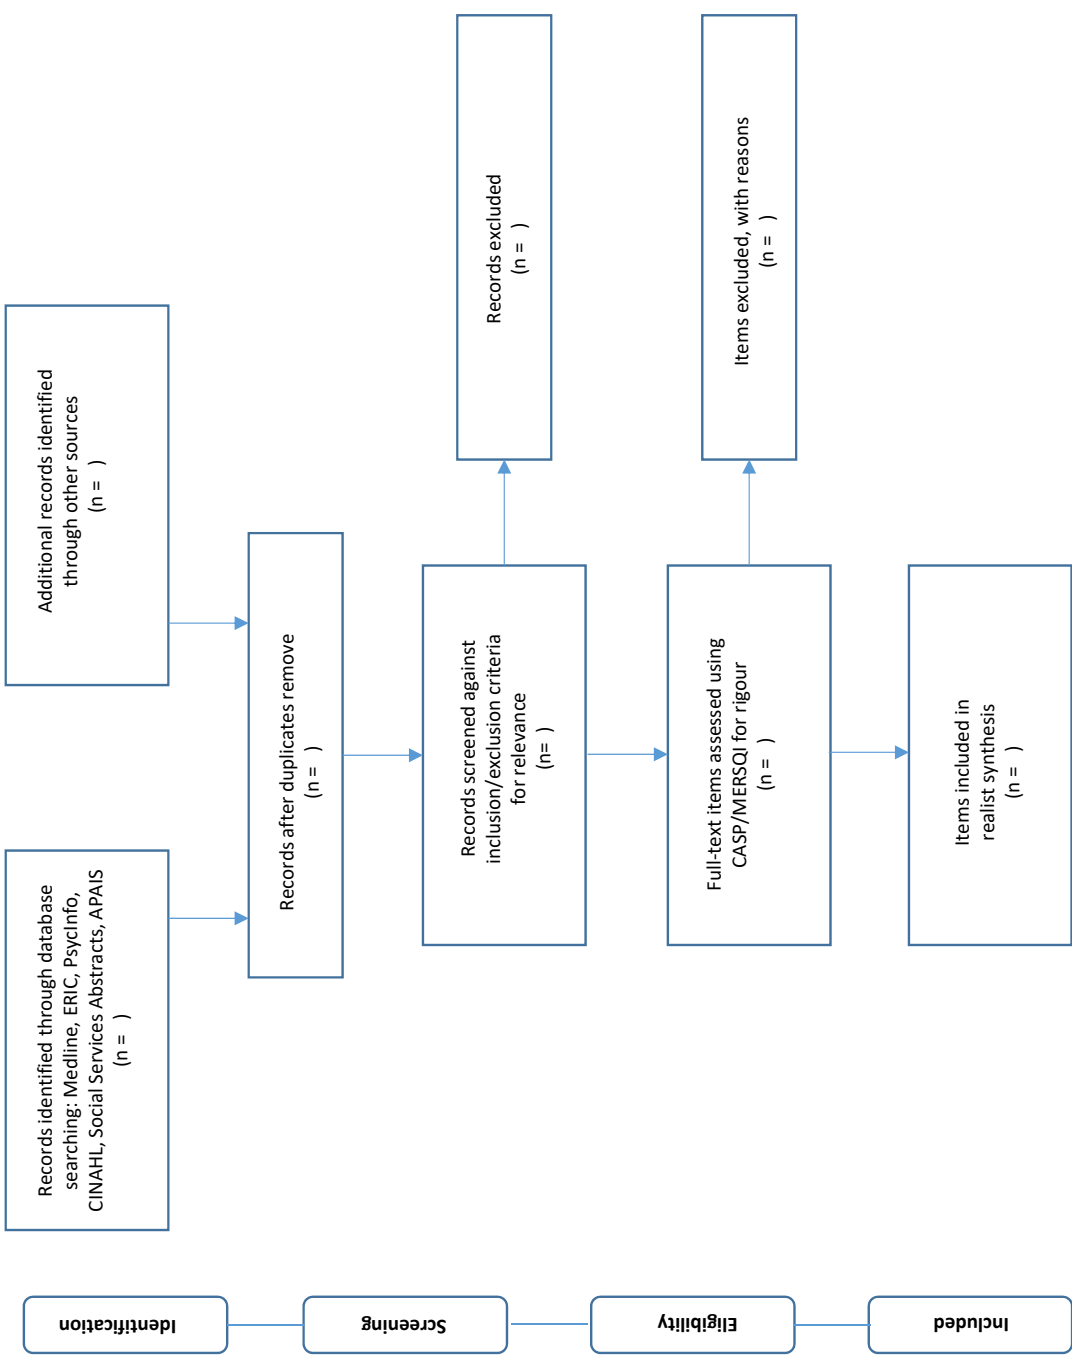

Supplement: bmjopen-2018-025777.draft_revisions.pdf [file bmjopen-2018-025777.draft_revisions.pdf]
